# Supplementary material for: Mechanisms affecting exercise ventilatory inefficiency-airflow obstruction relationship in male patients with chronic obstructive pulmonary disease
Source: Springer Nature journal article supplement (doi:10.1186/s12931-020-01463-4), 2020-08-06
Supplement: MOESM2 [file 18254546]

| ID   | Vd_VtMX | VD_VTmx_ | O2Ppk_rs | Brg_VO2n | VT_TIMAX_  | AGE | HT  | WT   |
|------|---------|----------|----------|----------|------------|-----|-----|------|
| 1001 | 0.546   | 0.04     | 3.434    | 12.74788 | 1.56515581 | 61  | 160 | 62.0 |
| 1002 | 0.609   | -0.15    | 0.558    | 9.615385 | 1.91538462 | 65  | 157 | 41.0 |
| 1003 | 0.487   | -0.17    | 3.194    | 11.30653 | 1.54899497 | 66  | 165 | 48.0 |
| 1004 | 0.522   | -0.13    | 3.162    | 8.87199  | 1.61850444 | 72  | 163 | 48.0 |
| 1005 | 0.517   | -0.05    | 3.688    | 9.782609 | 1.19565217 | 64  | 165 | 65.0 |
| 1006 | 0.531   | -0.09    | 5.61     | 10.33058 | 1.34504132 | 67  | 160 | 56.0 |
| 1007 | 0.407   | -0.15    | 5.395    | 9.584665 | 1.96911608 | 67  | 176 | 72.0 |
| 1008 | 0.477   | -0.07    | 3.35     | 5.741627 | 1.59808612 | 64  | 166 | 67.0 |
| 1009 | 0.608   | -0.03    | 1.775    | 18.82353 | 1.35764706 | 68  | 164 | 54.0 |
| 1010 | 0.493   | -0.11    | 5.062    | 10.6383  | 1.71702128 | 67  | 169 | 61.0 |
| 1011 | 0.490   | 0.01     | 3.397    | 12.13592 | 1.53398058 | 51  | 164 | 49.0 |
| 1012 | 0.648   | -0.03    | 2.093    | 19.01141 | 1.58745247 | 63  | 172 | 58   |
| 1013 | 0.491   | -0.16    | 5.036    | 12.58581 | 1.64187643 | 73  | 172 | 63   |
| 1014 | 0.447   | -0.13    | 3.687    | 10.43841 | 1.77870564 | 67  | 156 | 55   |
| 1015 | 0.451   | -0.16    | 3.274    | 10.36269 | 1.4984456  | 70  | 174 | 61   |
| 1016 | 0.481   | -0.07    | 4.134    | 12.44344 | 1.46945701 | 67  | 160 | 60   |
| 1017 |         | 0.00     | 7.037    | 8.902077 | 1.71018793 | 50  | 168 | 55   |
| 1018 | 0.500   | -0.07    | 4.22     | 12.57862 | 1.25408805 | 67  | 161 | 55   |
| 1019 | 0.569   | 0.11     | 1.928    | 12.56732 | 2.1561939  | 55  | 175 | 69   |
| 1020 | 0.424   | -0.02    | 3.031    | 12.85714 | 1.19857143 | 63  | 168 | 59   |
| 1021 | 0.363   | -0.04    | 3.352    | 6.216006 | 1.68376068 | 62  | 176 | 60   |
| 1022 | 0.586   | 0.03     | 2.099    | 15.29637 | 1.71892925 | 63  | 168 | 54   |
| 1023 | 0.462   | -0.16    | 5.425    | 10.28037 | 1.99906542 | 71  | 162 | 63   |
| 1024 | 0.405   | -0.28    | 5.009    | 8.38223  | 1.34534786 | 67  | 166 | 55.0 |
| 1025 | 0.331   | -0.29    | 7.75     | 4.36409  | 1.36346633 | 62  | 160 | 58.0 |
| 1026 | 0.336   | -0.29    | 8.854    | 5.442177 | 1.29591837 | 69  | 162 | 67.5 |
| 1027 | 0.363   | -0.18    | 7.364    | 5.8862   | 1.4911707  | 76  | 166 | 65.0 |
| 1028 | 0.468   | -0.11    | 4.971    | 5.529226 | 1.32701422 | 64  | 160 | 52.0 |
| 1029 | 0.220   | -0.25    | 5.255    | 8.211679 | 1.01277372 | 67  | 160 | 56.0 |
| 1030 | 0.458   | -0.20    | 3.424    | 11.72333 | 2.12778429 | 69  | 161 | 44.0 |
| 1031 | 0.252   | -0.23    | 5.978    | 5.904059 | 0.97638376 | 64  | 165 | 53.0 |
| 1032 | 0.389   | -0.25    | 6.761    | 5.098325 | 1.40932265 | 67  | 165 | 50.0 |
| 1033 | 0.307   | -0.19    | 7.976    | 4.393191 | 1.41625481 | 69  | 173 | 65.0 |
| 1034 | 0.347   | -0.26    | 5.053    | 8.347245 | 1.16777963 | 62  | 166 | 66.0 |
| 1035 |         | -0.53    | 9.454    | 5.063291 | 1.18177215 | 52  | 171 | 75.0 |
| 1036 | 0.462   | -0.04    | 5.899    | 6.092917 | 1.2033511  | 75  | 173 | 70.0 |
| 1037 | 0.443   | -0.17    | 5.917    | 8.445946 | 1.55236486 | 68  | 162 | 46   |
| 1038 | 0.456   | -0.15    | 5.555    | 9.478673 | 1.30995261 | 63  | 161 | 65   |
| 1039 | 0.467   | -0.26    | 4.972    | 9.060023 | 0.99207248 | 66  | 150 | 59   |
| 1040 | 0.289   | -0.31    | 3.528    | 3.386005 | 1.14108352 | 75  | 147 | 41   |
| 1041 | 0.417   | -0.24    | 6.716    | 3.053435 | 1.29923664 | 65  | 164 | 87   |
| 1042 | 0.367   | -0.25    | 6.085    | 3.109453 | 1.34950249 | 60  | 174 | 92   |
| 1043 | 0.188   | -0.31    | 6.015    | 4.250152 | 0.96964177 | 57  | 173 | 86   |

|      |       |       |       |          |            |    |     |    |
|------|-------|-------|-------|----------|------------|----|-----|----|
| 1044 | 0.360 | -0.22 | 9.185 | 7.372654 | 1.21648794 | 61 | 167 | 54 |
| 1045 | 0.369 | -0.23 | 4.721 | 9.066183 | 1.67089755 | 66 | 160 | 59 |
| 1046 | 0.345 | -0.15 | 8.674 | 9.632224 | 1.25744308 | 71 | 164 | 78 |

| BMI   | SMOKE | MAXIMUM po | OCD | TRICEP | MIDARM | BORGRS | BORGLT | BORGMX |
|-------|-------|------------|-----|--------|--------|--------|--------|--------|
| 24.22 | 45    | 0          | 3   | 5.50   | 28.00  | 0      | 0.0    | 9      |
| 16.63 | 15    | 2          | 6   | 2.50   | 21.50  | 0      | 2.0    | 5      |
| 17.63 | 50    | 2          | 8   | 3.20   | 25.00  | 0      | 1.0    | 9      |
| 18.07 | 50    | 4          | 7   | 4.50   | 24.00  | 0      | 0.0    | 7      |
| 23.88 | 40    | 2          | 7   | 7.50   | 29.00  | 0      | 1.0    | 9      |
| 21.88 | 45    | 2          | 7   | 6.00   | 18.00  | 0      | 3.0    | 10     |
| 23.24 | 40    | 4          | 8   | 8.50   | 31.00  | 0      | 0.0    | 9      |
| 24.31 | 30    | 3          | 9   | 8.00   | 31.00  | 0      | 3.0    | 6      |
| 20.08 | 40    | 0          | 6   | 8.00   | 26.00  | 0      | 1.5    | 8      |
| 21.36 | 50    | 2          | 9   | 6.00   | 28.00  | 0      | 8.0    | 10     |
| 18.22 | 33    | 1          | 8   | 3.20   | 23.00  | 0      | 2.0    | 10     |
| 19.61 | 80    | 1          | 6   | 3.5    | 28     | 0      | 3.0    | 10     |
| 21.30 | 56    | 2          | 6   | 4      | 30     | 0      | 1.0    | 11     |
| 22.60 | 40    | 7          | 8   | 7      | 25.5   | 0      | 0.0    | 10     |
| 20.15 | 50    | 4          | 8   | 6      | 24.5   | 0      | 3.0    | 10     |
| 23.44 | 50    | 4          | 6   | 5.5    | 26.5   | 0.5    | 1.0    | 11     |
| 19.49 | 20    | 1          | 7   |        |        | 0      | 5      | 9      |
| 21.22 | 40    | 1          | 5.5 | 6.5    | 27.5   | 0      | 7      | 10     |
| 22.53 | 10    | 0          | 5   | 5.5    | 28.5   | 0.5    |        | 7      |
| 20.90 | 40    | 1          | 5   | 4      | 26     | 0      | 3      | 9      |
| 19.37 | 40    | 6          | 7   |        |        | 0      | 2      | 8      |
| 19.13 | 40    | 1          | 7   | 7.5    | 26.5   | 0      | 0.5    | 8      |
| 24.01 | 114   | 1          | 8   | 8      | 28.5   | 0      | 2      | 11     |
| 19.96 | 30    | 5          | 7   | 4.00   | 28.00  | 0      | 1.0    | 10     |
| 22.66 | 25    | 4          | 8   | 3.50   | 28.00  | 0      | 4.0    | 7      |
| 25.72 | 45    | 0          | 6   | 7.50   | 28.50  | 0      | 2.0    | 8      |
| 23.59 | 60    | 1          | 5   | 4.10   | 28.00  | 1      | 6.0    | 9      |
| 20.31 | 47    | 2          | 6   | 2.50   | 25.50  | 0      | 4.5    | 7      |
| 21.88 | 19    | 2          | 7   | 4.50   | 25.00  | 0      | 3.5    | 9      |
| 16.97 | 40    | 5          | 6   | 2.50   | 24.00  | 0      | 1.5    | 10     |
| 19.47 | 15    | 3          | 7.5 | 7.00   | 27.00  | 0      | 2.5    | 8      |
| 18.37 | 50    | 5          | 10  | 5.50   | 26.00  | 0      | 1.0    | 7      |
| 21.72 | 19    | 6          | 9   | 5.50   | 29.00  | 0      | 2.0    | 8      |
| 23.95 | 40    | 2          | 8   | 8.00   | 31.00  | 0      | 3.0    | 10     |
| 25.65 | 30    | 4          | 9   | 8.50   | 18.00  | 0      | 3.0    | 10     |
| 23.39 | 60    | 0          | 9   | 11.0   | 30.00  | 0      | 1.0    | 8      |
| 17.53 | 40    | 3          | 7   | 3.5    | 25     | 0      | 9.0    | 10     |
| 25.08 | 20    | 1          | 8.5 | 10.5   | 30.5   | 0      | 4.0    | 10     |
| 26.22 | 75    | 1          | 7.3 | 9      | 32     | 0      | 1      | 8      |
| 18.97 | 40    | 5          | 5   | 4.5    | 25.5   | 0      | 3      | 3      |
| 32.35 | 40    | 4          | 8.5 | 12     | 32     | 0      | 4      | 4      |
| 30.39 | 80    | 7          | 6   | 11.5   | 33.5   | 1      | 2      | 5      |
| 28.73 | 15    | 5          | 6   | 7      | 32     | 0      | 3      | 7      |

|       |    |   |   |     |      |   |     |    |
|-------|----|---|---|-----|------|---|-----|----|
| 19.36 | 45 | 4 | 8 | 6.5 | 25.5 | 0 | 1   | 11 |
| 23.05 | 41 | 7 | 7 | 9   | 28.5 | 0 | 0   | 10 |
| 29.00 | 51 | 0 | 7 | 12  | 32.5 | 0 | 0.5 | 11 |

| BORG3    | BORG7    | HTR_36_       | CTR__         | DPA_1.8c   | _15 cm2     | _10cm2      | _13 cm2     | _8 cm2      |
|----------|----------|---------------|---------------|------------|-------------|-------------|-------------|-------------|
| 1        | 0        | 0.3803        | 0.4328        | 1.4        | 18.5        | 8.68        | 13.7        | 8.89        |
| 0.5      | 0.5      | 0.4235        | 0.4392        | 1.4        | 10.7        | 6.35        | 9.81        | 6.23        |
| 2        | 0        | 0.3956        | 0.4249        | 2          | 15.2        | 10          | 17.4        | 6.89        |
| 1        | 0        | 0.3581        | 0.5152        | 2.1        | 17.1        | 8.06        | 13.2        | 8.95        |
| 1        | 0        | 0.3608        | 0.3436        | 1.4        | 6.49        | 3.65        | 11.4        | 5.83        |
| 3        | 0        | 0.3422        | 0.4551        | 1.5        | 12.3        | 7.9         | 15.2        | 6.67        |
| 0        | 0        | 0.376         | 0.522         | 1.5        | 17.6        | 7.9         | 17.9        | 10.5        |
| 0.5      | 0        | 0.3547        | 0.4122        | 1.4        | 12.2        | 8           | 11.6        | 8.54        |
| 5        | 1        | 0.3548        | 0.5018        | 1.8        | 11.9        | 7.29        | 12.5        | 9.21        |
| 4        | 1        | 0.3737        | 0.4184        | 1.4        | 12.8        | 7.9         | 12.6        | 7.54        |
| 0        | 0        | 0.3207        | 0.3517        | 1.6        | 13.5        | 8.65        | 15.6        | 8.28        |
| 3        | 0        | 0.374         | 0.351         | 1.3        | 12.2        | 7.39        | 12.7        | 7.76        |
| 3        | 0        | 0.43          | 0.35          | 1.5        | 10.2        | 7.88        | 13.5        | 5.98        |
| 1        | 0        | 0.3692        | 0.448         | 1.4        | 11.1        | 6.75        | 10.3        | 7.29        |
| 2        | 0        | 0.3168        | 0.429         | 1.4        | 10.7        | 7.12        | 12.9        | 6.38        |
| 6        | 0.5      | 0.3576        | 0.5208        | 1.8        | 8.83        | 4.49        | 15.3        | 6.09        |
|          |          | 0.361         | 0.358         | 1.4        | 10.1        | 5.4         | 8.7         | 5.4         |
| 6        | 0        | 0.283         | 0.424         | 2          | 11.3        | 9.45        | 13.2        | 9.65        |
| 3        | 2        | 0.344         | 0.491         | 2          |             |             |             |             |
| 2        | 0        |               |               | 1          | 10.8        | 7.82        | 11.5        | 6.55        |
| 2        | 0        | 0.427         |               | 1.2        |             |             |             |             |
| 8        | 1        | 0.301         | 0.425         | 1.4        | 16.9        | 8.89        | 13.5        | 8.64        |
| 3        | 0        |               | 0.478         | 1.7        | 9.12        | 5.64        | 10.6        | 7.17        |
| <hr/>    |          |               |               |            |             |             |             |             |
| 2        | 0        | 0.3698        | 0.4204        | 1.5        | 10.6        | 5.24        | 14.3        | 5.47        |
| 0.5      | 1        | 0.383         |               | 2.5        | 19.8        | 7.51        | 19.7        | 11.7        |
| 1        | 1        | 0.34          | 0.4548        | 1.55       | 15.2        | 5.83        | 20.3        | 8.25        |
| 1        | 1        | 0.3729        | 0.4814        | 1.8        | 26.2        | 12          | 21.7        | 8.97        |
| 2        | 0        | 0.3922        | 0.422         | 1.65       | 13.2        | 7.87        | 14.8        | 8.64        |
| 2        | 0.5      | 0.3621        | 0.4086        | 1.7        | 16.9        | 10.8        | 17.3        | 9.64        |
| 0.5      | 0        | 0.4297        | 0.3954        | 1.6        | 10.2        | 5.76        | 10.1        | 4.73        |
| <b>1</b> | <b>0</b> | <b>0.3523</b> | <b>0.3617</b> | <b>1.3</b> | <b>9.13</b> | <b>5.08</b> | <b>12.8</b> | <b>5.36</b> |
| 2        | 0        | 0.3682        | 0.4404        | 1.4        | 12.2        | 9.7         | 10.2        | 4.57        |
| <b>2</b> | <b>0</b> | <b>0.2823</b> |               | <b>1.8</b> | <b>14.4</b> | <b>7.19</b> | <b>12.8</b> | <b>4.7</b>  |
| 3        | 0        | 0.374         | 0.514         | 1.3        | 11.4        | 5.76        | 14.3        | 5.92        |
| 0.5      | 0        | 0.3312        | 0.4841        | 1.4        | 17.5        | 10.5        | 17          | 8.15        |
| 1        | 0        | 0.3541        | 0.4295        | 1.6        | 14.2        | 9.87        | 14.2        | 8.11        |
| 4        | 1        | 0.3913        | 0.36956       | 2          | 13.7        | 9.67        | 13.9        | 6.4         |
| 1.5      | 0        | 0.33          | 0.446         | 1.7        | 11.4        | 9.35        | 24          | 14.4        |
| 2        | 0        | 0.394         | 0.56          | 2.5        | 17.4        | 9.98        | 17.4        | 12.3        |
| 1        | 1        | 0.367         | 0.367         | 1.6        |             |             |             |             |
| 2        | 1        | 0.407         | 0.607         | 2.5        |             |             |             |             |
| 0.5      | 0        | 0.385         |               | 1.6        | 16.9        | 8.36        | 17.1        | 6.76        |
| 2        | 0        | 0.379         | 0.548         | 1.5        | 12.5        | 7.04        | 13.5        | 9.19        |

|   |   |       |       |     |      |      |      |      |
|---|---|-------|-------|-----|------|------|------|------|
| 5 | 1 | 0.279 | 0.364 | 1.4 | 10.9 | 7.29 | 9.48 | 6.63 |
|   |   | 0.351 | 0.466 | 1.4 | 16.3 | 9.67 | 13.4 | 4.82 |
| 2 | 0 | 0.338 | 0.495 | 1.5 | 17.9 | 9.6  | 13.3 | 6.9  |

| IVS | _6 mm | TR | TLC  | TLCpred | FRC  | FRCpred | IC   | RV   |
|-----|-------|----|------|---------|------|---------|------|------|
| 0   | 3.45  | 0  | 6.62 | 1.33    | 5.29 | 1.81    | 1.33 | 4.04 |
| 0   | 6.74  | 1  | 4.48 | 1.14    | 3.21 | 1.18    | 1.27 | 2.53 |
| 0   | 4     | 1  | 8.8  | 1.63    | 7.72 | 2.16    | 1.08 | 6.2  |
| 1   | 7.28  | 1  | 5.49 | 1.09    | 3.26 | 0.97    | 2.23 | 3.1  |
| 0   | 7.31  | 0  | 7.18 | 1.56    | 6.15 | 2.26    | 1.03 | 4.55 |
| 0   | 6.1   | 1  | 6.54 | 1.58    | 4.5  | 1.76    | 2.04 | 3.47 |
| 0   | 6.9   | 1  | 6.86 | 1.28    | 4.4  | 1.39    | 2.46 | 3.37 |
| 0   | 7.14  | 0  | 6.52 | 1.36    | 4.32 | 1.52    | 2.2  | 3.64 |
| 0   | 7.27  | 1  | 6.97 | 1.53    | 5.5  | 1.88    | 1.47 | 3.98 |
| 0   | 5.37  | 1  | 7.1  | 1.43    | 4.72 | 1.53    | 2.38 | 4.4  |
| 0   | 10    | 1  | 7.25 | 1.52    | 5.26 | 1.74    | 1.99 | 4.44 |
| 0   | 5.14  | 1  | 5.75 | 1.1     | 4.72 | 1.44    | 1.03 | 3.7  |
| 0   | 5     | 0  | 8.1  | 1.59    | 6.12 | 1.91    | 1.98 | 5.52 |
| 0   | 8.3   | 1  | 5.08 | 1.36    | 3.65 | 1.58    | 1.43 | 2.86 |
| 0   | 6.4   | 0  | 8.48 | 1.8     | 6.72 | 2.26    | 1.76 | 5.39 |
| 0   | 9.6   | 1  | 4.97 | 1.07    | 3.97 | 1.43    | 1    | 3.44 |
| 0   | 4.9   | 1  | 6.87 | 1.38    | 5.57 | 1.83    | 1.3  | 3.26 |
| 0   | 4.5   | 1  | 6    | 1.24    | 5.04 | 1.68    | 0.96 | 4.17 |
|     |       |    | 8.18 | 1.482   | 6.69 | 2.07    | 1.49 | 5.64 |
| 0   | 8     | 1  | 7.09 | 1.604   | 6.07 | 2.2     | 1.02 | 4.91 |
|     |       |    | 7.76 | 1.429   | 5.21 | 1.53    | 2.55 | 3.89 |
| 0   | 2.74  | 1  | 6.81 | 1.42    | 5.88 | 1.95    | 0.93 | 5.44 |
| 0   | 5.94  | 1  | 6.51 | 1.51    | 4.73 | 1.81    | 1.78 | 4.41 |
|     | 7     | 0  | 6.87 | 1.29    | 5.09 | 1.49    | 1.78 | 4.27 |
| 0   | 3.11  | 1  | 6.5  | 1.55    | 4.88 | 1.89    | 1.62 | 3.27 |
| 0   | 6.5   | 1  | 6.36 | 1.31    | 4.37 | 1.57    | 1.99 | 3.8  |
| 0   | 3.9   | 1  | 7.05 | 1.24    | 4.63 | 1.3     | 2.42 | 3.06 |
| 0   | 6     | 1  | 5.74 | 1.37    | 4.3  | 1.39    | 1.44 | 3.59 |
| 0   | 5     | 1  | 7.06 | 1.45    | 5.57 | 1.83    | 1.49 | 4.39 |
| 0   | 6     | 1  | 5.65 | 1.37    | 4.52 | 1.63    | 1.13 | 2.77 |
| 0   | 2.95  | 0  | 6.6  | 1.22    | 4.92 | 1.42    | 1.68 | 3.82 |
| 0   | 3     | 1  | 6.23 | 1.22    | 3.36 | 1.02    | 2.87 | 2.79 |
| 0   | 3.32  | 0  | 8.71 | 1.5     | 6.01 | 1.63    | 2.7  | 3.08 |
| 0   | 6     | 0  | 5.29 | 1.15    | 4.36 | 1.63    | 0.93 | 3.29 |
| 0   | 6.88  | 0  | 6.05 | 1.17    | 4.11 | 1.48    | 1.94 | 3.05 |
| 0   | 10    | 1  | 6.01 | 1.24    | 4.5  | 1.53    | 1.51 | 4.28 |
| 0   | 6.8   | 1  | 6.02 | 1.33    | 4.14 | 1.35    | 1.88 | 2.87 |
| 1   | 7.5   | 0  | 5.69 | 1.05    | 3.99 | 1.24    | 1.7  | 3.57 |
| 0   | 1.3   | 1  | 5.07 | 1.3     | 3.63 | 1.57    | 1.44 | 2.78 |
|     |       |    | 5.51 | 1.7     | 4.43 | 2.13    | 1.08 | 3.08 |
|     |       | 1  | 5.38 | 0.998   | 3.69 | 1.3     | 1.69 | 2.78 |
|     | 4     | 1  | 6.23 | 0.972   | 3.78 | 1.12    | 2.45 | 3.12 |
| 0   | 6.86  | 0  | 6.59 | 0.918   | 3.59 | 0.9     | 3    | 2.99 |

|   |      |   |      |      |      |      |      |      |
|---|------|---|------|------|------|------|------|------|
| 0 | 5.9  | 0 | 8.31 | 1.68 | 6.35 | 2.07 | 1.96 | 5.62 |
| 0 | 7.77 | 0 | 6.06 | 1.38 | 4.38 | 1.62 | 1.68 | 2.78 |
| 0 | 9    | 1 | 5.54 | 1.23 | 4.07 | 1.62 | 1.47 | 3.16 |



| RV_TLC | DLCO | DLCOpred | DLCOprct_FVC | FVCpred | FEV1  | FEV1pred | FEV1_ |      |
|--------|------|----------|--------------|---------|-------|----------|-------|------|
| 0.61   | 9.6  | 0.42     | 0.41         | 2.58    | 0.81  | 0.88     | 0.36  | 0.34 |
| 0.56   | 15.8 | 0.75     | 0.71         | 1.95    | 0.81  | 1.04     | 0.56  | 0.53 |
| 0.7    | 8.8  | 0.37     | 0.38         | 2.6     | 0.77  | 0.88     | 0.34  | 0.34 |
| 0.56   | 10.2 | 0.5      | 0.47         | 2.3     | 0.76  | 1.3      | 0.56  | 0.57 |
| 0.63   | 19.4 | 0.8      | 0.82         | 2.39    | 0.82  | 0.73     | 0.32  | 0.31 |
| 0.53   | 20.2 | 0.93     | 0.9          | 2.69    | 1.07  | 1.26     | 0.65  | 0.47 |
| 0.49   | 13.4 | 0.5      | 0.54         | 3.49    | 1.03  | 1.81     | 0.69  | 0.52 |
| 0.56   | 17.9 | 0.71     | 0.75         | 2.84    | 0.93  | 1.74     | 0.74  | 0.61 |
| 0.57   | 8.1  | 0.35     | 0.36         | 2.5     | 0.89  | 0.92     | 0.43  | 0.37 |
| 0.62   | 13.7 | 0.54     | 0.58         | 2.35    | 0.76  | 1.34     | 0.56  | 0.57 |
| 0.61   | 13.3 | 0.5      | 0.51         | 2.81    | 0.87  | 1.19     | 0.47  | 0.42 |
| 0.64   | 11.3 | 0.42     | 0.45         | 1.46    | 0.44  | 0.58     | 0.22  | 0.4  |
| 0.68   | 19.8 | 0.79     | 0.86         | 1.98    | 0.64  | 0.95     | 0.4   | 0.48 |
| 0.56   |      |          |              | 2.19    | 1     | 1.47     | 0.85  | 0.67 |
| 0.64   | 16.3 | 0.68     | 0.68         | 3.09    | 1.07  | 0.99     | 0.44  | 0.32 |
| 0.69   | 15.6 | 0.71     | 0.7          | 1.57    | 0.48  | 0.75     | 0.32  | 0.48 |
| 0.47   | 20.4 | 0.73     | 0.75         | 3.83    | 1.15  | 2.5      | 0.886 | 0.73 |
| 0.695  | 12.4 | 0.82     | 0.55         | 2.08    | 0.644 | 0.62     | 0.253 | 0.3  |
| 0.69   | 5.3  | 0.24     | 0.19         | 2.69    | 0.68  | 0.54     | 0.171 | 0.2  |
| 0.69   | 13.6 | 0.57     | 0.56         | 1.58    | 0.44  | 0.8      | 0.288 | 0.77 |
| 0.5    | 23.4 | 0.84     | 0.9          | 3.59    | 1.02  | 2.74     | 1     | 0.8  |
| 0.8    | 7.9  | 0.31     | 0.32         | 2.47    | 0.81  | 0.73     | 0.31  | 0.3  |
| 0.68   | 12.4 | 0.79     | 0.57         | 1.58    | 0.61  | 0.86     | 0.43  | 0.54 |
| 0.62   | 15.9 | 0.68     | 0.68         | 2.5     | 0.76  | 1.14     | 0.45  | 0.46 |
| 0.5    | 22.4 | 0.99     | 0.96         | 3.02    | 1.14  | 1.42     | 0.69  | 0.47 |
| 0.6    | 18.7 | 0.87     | 0.84         | 1.99    | 0.62  | 0.88     | 0.37  | 0.44 |
| 0.43   | 20.5 | 0.87     | 0.95         | 3.84    | 1.13  | 1.86     | 0.72  | 0.48 |
| 0.63   | 17.8 | 0.79     | 0.78         | 2.1     | 0.68  | 0.92     | 0.39  | 0.44 |
| 0.62   | 12   | 0.55     | 0.54         | 1.96    | 0.65  | 0.79     | 0.34  | 0.4  |
| 0.49   | 9.3  | 0.44     | 0.42         | 2.86    | 1.16  | 1.11     | 0.59  | 0.39 |
| 0.58   | 14.8 | 0.61     | 0.62         | 2.74    | 0.8   | 1.08     | 0.41  | 0.39 |
| 0.45   | 12.2 | 0.54     | 0.53         | 3.1     | 0.98  | 1.82     | 0.75  | 0.59 |
| 0.35   | 21.3 | 0.83     | 0.88         | 4.28    | 1.14  | 1.86     | 0.64  | 0.43 |
| 0.62   | 21.9 | 0.89     | 0.9          | 2       | 0.68  | 1.32     | 0.57  | 0.66 |
| 0.5    | 32.1 | 1.14     | 1.18         | 3       | 0.86  | 1.66     | 0.6   | 0.55 |
| 0.71   | 15.7 | 0.66     | 0.69         | 1.63    | 0.56  | 1.05     | 0.47  | 0.64 |
| 0.48   | 11.4 | 0.49     | 0.51         | 3.02    | 1.08  | 1.61     | 0.75  | 0.53 |
| 0.63   | 19.9 | 1.1      | 0.85         | 1.85    | 0.52  | 0.64     | 0.22  | 0.35 |
| 0.55   | 14.6 | 1.02     | 0.7          | 2.11    | 0.92  | 1.04     | 0.59  | 0.49 |
| 0.56   | 6.4  | 0.66     | 0.34         | 2.15    | 0.96  | 1.13     | 0.576 | 0.53 |
| 0.52   | 20.3 | 0.85     | 0.87         | 1.76    | 0.52  | 1.16     | 0.448 | 0.66 |
| 0.5    | 17.2 | 0.61     | 0.66         | 2.05    | 0.53  | 0.84     | 0.279 | 0.41 |
| 0.45   | 28.7 | 0.91     | 1.08         | 3.45    | 0.89  | 1.49     | 0.49  | 0.43 |

|      |      |      |      |      |      |      |      |      |
|------|------|------|------|------|------|------|------|------|
| 0.69 | 12.9 | 0.5  | 0.52 | 2.22 | 0.71 | 1.19 | 0.49 | 0.54 |
| 0.46 | 15.1 | 0.65 | 0.67 | 2.24 | 0.82 | 1.07 | 0.51 | 0.48 |
| 0.57 | 19.2 | 1    | 0.87 | 1.9  | 0.7  | 1.1  | 0.53 | 0.58 |

| SVC  | SVCpred | MIPcmH <sub>2</sub> O | MEPcmH <sub>2</sub> O | POSTMIP | POSTMEI | PEFR | PFRpred | LA_RSWI |
|------|---------|-----------------------|-----------------------|---------|---------|------|---------|---------|
| 2.58 | 0.81    | 62                    | 148                   | 53      | 132     | 2.6  | 0.38    | 0.57    |
| 1.95 | 0.81    | 50                    | 70                    | 35      | 63      | 2.87 | 0.52    |         |
| 2.6  | 0.77    | 70                    | 93                    | 70      | 101     | 1.66 | 0.23    | 0.68    |
| 2.3  | 0.76    | 48                    | 71                    |         |         | 2.54 | 0.38    | 0.45    |
| 2.63 | 0.91    | 55                    | 94                    | 60      | 106     | 1.4  | 0.17    | 0.36    |
| 3.07 | 1.22    | 46                    | 93                    |         |         | 1.59 | 0.21    | 0.29    |
| 3.49 | 1.03    | 86                    | 105                   | 80      | 110     | 4.15 | 0.46    | 0.39    |
| 2.88 | 0.95    | 99                    | 104                   | 90      | 106     | 2.25 | 0.27    | 0.35    |
| 2.99 | 1.07    | 39                    | 80                    | 55      | 91      | 3.35 | 0.55    | 0.37    |
| 2.7  | 0.87    | 91                    | 122                   | 83      | 128     | 3.12 | 0.38    | 0.38    |
| 2.81 | 0.87    | 75                    | 83                    | 79      | 78      | 3.02 | 0.36    | 0.37    |
| 2.05 | 0.61    | 54                    | 121                   | 71      | 129     | 1.18 | 0.27    |         |
| 2.58 | 0.83    | 60                    | 94                    | 70      | 119     | 1.61 | 0.25    | 0.37    |
| 2.22 | 1       | 80                    | 92                    | 81      | 82      | 4.13 | 0.78    | 0.19    |
| 3.09 | 1.07    | 66                    | 81                    | 75      | 118     | 2.34 | 0.38    | 0.5     |
| 1.5  | 0.54    | 52                    | 129                   | 87      | 104     | 1.15 | 0.15    | 0.43    |
| 3.61 | 1.07    | 42                    | 108                   | 39      | 108     | 4.55 | 0.533   | 0.31    |
| 1.83 | 0.62    | 50                    | 92                    | 61      | 98      | 1.71 | 0.221   | 0.23    |
| 2.54 | 0.46    |                       |                       |         |         | 1.11 | 0.126   | 0.37    |
| 2.18 | 0.776   | 42                    | 56                    | 88      | 74      | 1.5  | 0.182   | 0.24    |
| 3.87 | 1.102   | 61                    | 84                    | 44      | 81      | 7.3  | 1.034   |         |
| 1.37 | 0.45    | 45                    | 126                   | 47      | 128     | 2.19 | 0.34    | 0.57    |
| 2.1  | 0.81    | 108                   | 160                   | 115     | 214     | 2.92 | 0.51    | 0.6     |
| 2.6  | 0.79    | 71                    | 99                    | 58      | 109     | 2.45 | 0.31    | 0.46    |
| 3.23 | 1.22    | 72                    | 69                    | 88      | 75      | 4.03 | 0.69    | 0.3     |
| 2.56 | 0.87    | 49                    | 125                   | 97      | 129     | 3.05 | 0.4     | 0.51    |
| 3.99 | 1.18    | 68                    | 75                    | 81      | 92      | 3.19 | 0.43    | 0.95    |
| 2.15 | 0.7     | 84                    | 88                    |         |         | 2.5  | 0.37    | 0.4     |
| 2.67 | 0.89    | 87                    | 111                   | 81      | 84      | 1.58 | 0.2     | 0.43    |
| 2.88 | 1.17    | 59                    | 97                    | 52      | 99      | 1.57 | 0.2     | 0.64    |
| 2.78 | 0.82    | 51                    | 107                   | 71      | 101     | 2.09 | 0.26    | 0.52    |
| 3.44 | 1.09    | 74                    | 104                   |         |         | 4.65 | 0.59    | 0.34    |
| 4.6  | 1.22    | 82                    | 114                   | 93      | 136     | 4.28 | 0.55    | 0.46    |
| 2    | 0.68    | 84                    | 133                   | 72      | 131     | 4.6  | 0.56    | 0.35    |
| 3    | 0.86    | 86                    | 130                   | 102     | 109     | 5.78 | 0.83    | 0.46    |
| 1.73 | 0.59    | 76                    | 117                   | 106     | 121     | 3.17 | 0.39    | 0.52    |
| 3.15 | 1.13    | 85                    | 105                   | 91      | 81      | 3.94 | 0.65    | 0.25    |
| 2.12 | 0.62    | 91                    | 145                   |         |         | 1.68 | 0.2     | 0.22    |
| 2.29 | 0.99    | 55                    | 80                    | 68      | 91      | 2.3  | 0.65    | 0.21    |
| 2.42 | 1.36    |                       |                       | 42      | 58      | 2.99 | 0.72    | 0.54    |
| 2.6  | 0.769   | 57                    | 119                   | 62      | 113     | 4.08 | 0.563   | 0.4     |
| 3.11 | 0.748   | 87                    | 117                   | 74      | 110     | 2.64 | 0.305   | 0.44    |
| 3.6  | 0.755   | 108                   | 111                   | 112     | 89      | 3.75 | 0.408   | 0.69    |

|      |      |    |     |    |     |      |      |      |
|------|------|----|-----|----|-----|------|------|------|
| 2.51 | 0.81 | 84 | 101 | 69 | 102 | 4.01 | 0.62 | 0.33 |
| 3.28 | 1.2  | 52 | 108 | 56 | 97  | 2.35 | 0.41 | 0.38 |
| 2.38 | 0.87 |    |     |    |     | 1.88 | 0.31 | 0.46 |

| LACLTW | LACMXW | LARSPL | LACLTPL | LACMXPL | LAMX_R | PH_REST | PH_LT | PH_MAX |
|--------|--------|--------|---------|---------|--------|---------|-------|--------|
|        | 1.9    | 1.28   |         | 3.61    | 2.33   | 7.4     |       | 7.354  |
|        |        | 0.97   |         | 4.37    | 3.4    | 7.38    |       | 7.316  |
| 0.9    | 3.35   | 1.64   | 1.87    | 6.42    | 4.78   | 7.36    | 7.357 | 7.274  |
| 0.85   | 3.35   | 1.1    | 1.75    | 5.55    | 4.45   | 7.35    | 7.337 | 7.282  |
| 0.57   | 2.58   | 1.27   | 1.4     | 5.57    | 4.3    | 7.37    | 7.356 | 7.285  |
| 0.35   | 1.76   | 0.7    | 0.83    | 2.97    | 2.27   | 7.36    | 7.351 | 7.277  |
| 0.68   | 3.01   | 1.16   | 1.39    | 5.2     | 4.04   | 7.41    | 7.414 | 7.361  |
| 0.46   | 2.83   | 0.92   | 1.17    | 4.82    | 3.9    | 7.41    | 7.389 | 7.315  |
| 0.32   | 1.11   | 1.01   | 1.06    | 2.66    | 1.65   | 7.42    | 7.411 | 7.377  |
| 0.68   | 2.32   | 0.9    | 1.2     | 4.24    | 3.34   | 7.39    | 7.379 | 7.346  |
| 0.79   | 2.87   | 1.06   | 1.61    | 4.76    | 3.7    | 7.43    | 7.402 | 7.351  |
|        |        |        |         |         |        | 7.38    |       | 7.334  |
| 0.83   | 2.11   | 1.63   | 1.75    | 4.51    | 2.88   | 7.39    | 7.391 | 7.334  |
| 0.41   | 5.38   | 1.34   | 1.44    | 8.04    | 6.7    | 7.41    | 7.44  | 7.34   |
| 0.65   | 3.05   | 1.59   | 1.76    | 5.75    | 4.16   | 7.41    | 7.406 | 7.319  |
| 0.36   | 3.11   | 1.12   | 1.07    | 5.91    | 4.79   | 7.45    | 7.423 | 7.328  |
| 0.5    | 1.68   | 0.9    | 1.06    | 3.78    | 2.88   |         |       |        |
| 0.79   | 2.3    | 0.93   | 1.77    | 4.66    | 3.73   | 7.39    | 7.357 | 7.287  |
| 0.39   | 0.97   | 1.02   | 0.75    | 1.49    | 0.47   | 7.46    | 7.398 | 7.384  |
| 0.36   | 0.91   | 0.72   | 1.05    | 1.99    | 1.27   | 7.39    | 7.382 | 7.336  |
|        |        | 1.65   | 3.79    | 9.81    | 8.16   | 7.42    | 7.392 | 7.319  |
| 0.57   | 1.9    | 1.18   | 1.16    | 3.24    | 2.06   | 7.38    | 7.382 | 7.325  |
| 0.63   | 2.52   | 1.59   | 1.32    | 4.41    | 2.82   | 7.43    | 7.406 | 7.364  |
| 0.87   | 3.61   | 1.01   | 1.48    | 6.11    | 5.1    | 7.41    | 7.368 | 7.27   |
| 0.47   | 3.18   |        |         | 5.6     |        | 7.44    | 7.401 | 7.318  |
| 0.58   | 1.8    | 1.96   | 1.7     | 3.93    | 1.97   | 7.41    | 7.421 | 7.376  |
|        | 2.99   | 1.88   |         | 4.64    | 2.76   | 7.4     |       | 7.352  |
| 0.44   | 3.25   | 0.95   | 1.09    | 5.93    | 4.98   | 7.35    | 7.34  | 7.25   |
| 0.78   | 2.56   | 1.04   | 1.43    | 4.08    | 3.04   | 7.4     | 7.375 | 7.306  |
| 1.06   | 4.06   | 1.17   | 2.09    | 6.25    | 5.08   | 7.39    | 7.376 | 7.305  |
| 0.95   | 3.52   |        |         |         |        | 7.37    | 7.349 | 7.287  |
| 0.65   | 4.13   | 1.17   | 1.44    | 7.96    | 6.79   | 7.42    | 7.399 | 7.329  |
| 0.74   | 4.67   | 0.83   | 1.57    | 7.4     | 6.57   | 7.43    | 7.388 | 7.265  |
| 0.6    | 2.48   | 0.86   | 1.19    | 4.69    | 3.83   | 7.39    | 7.377 | 7.338  |
| 0.65   | 2.51   | 1.26   | 1.31    | 4.18    | 2.92   | 7.43    | 7.414 |        |
|        | 1.71   | 1.04   |         | 2.72    | 1.68   | 7.38    |       | 7.36   |
| 0.55   | 3.07   | 1.36   | 1.39    | 5.53    | 4.17   | 7.39    | 7.386 | 7.312  |
| 0.66   | 3.14   | 0.73   | 1.24    | 4.49    | 3.76   | 7.38    | 7.348 | 7.292  |
| 0.3    | 0.7    | 0.98   | 1.03    | 1.87    | 0.89   | 7.3     | 7.301 | 7.275  |
|        | 3.61   | 1.47   |         | 6.63    | 5.16   | 7.39    |       | 7.284  |
|        | 3.18   | 1.634  |         | 6.99    | 5.36   | 7.37    |       | 7.326  |
| 1.26   | 4.87   | 1.13   | 2.56    | 8.25    | 7.12   | 7.38    | 7.356 | 7.252  |
| 0.77   | 3.8    | 1.5    | 1.77    | 5.66    | 4.16   | 7.37    | 7.353 | 7.261  |

|      |      |      |      |      |      |      |       |       |
|------|------|------|------|------|------|------|-------|-------|
| 0.61 | 3.56 | 0.84 | 1.21 | 6.28 | 5.44 | 7.39 | 7.382 | 7.294 |
| 0.69 | 5.4  | 1.22 | 1.67 | 10.7 | 9.5  | 7.42 | 7.4   | 7.322 |
| 0.41 | 2.18 | 1.07 | 1.07 | 3.96 | 2.89 | 7.4  | 7.409 | 7.353 |

| PHMX_RS | PaCO2RS | PaCO2LT | PaCO2MX | PCO2mx_1 | PaO2RST | PaO2LT | PaO2_MX | PO2rst_mx |
|---------|---------|---------|---------|----------|---------|--------|---------|-----------|
| 0.046   | 40      |         | 53      | 13       | 57      |        | 45      | 13        |
| 0.062   | 41      |         | 44      | 4        | 82      |        | 64      | 18        |
| 0.085   | 44      | 47      | 53      | 9        | 74      | 71     | 58      | 15        |
| 0.066   | 42      | 44      | 47      | 5        | 84      | 87     | 83      | 1         |
| 0.08    | 51      | 50      | 60      | 9        | 87      | 82     | 56      | 31        |
| 0.086   | 39      | 39      | 49      | 10       | 92      | 87     | 59      | 32        |
| 0.052   | 33      | 33      | 32      | -1       | 84      | 76     | 68      | 16        |
| 0.098   | 33      | 39      | 43      | 10       | 89      | 81     | 77      | 13        |
| 0.039   | 43      | 43      | 48      | 5        | 71      | 68     | 56      | 15        |
| 0.043   | 39      | 38      | 39      | 0        | 85      | 89     | 82      | 2         |
| 0.082   | 39      | 42      | 47      | 7        | 82      | 77     | 71      | 11        |
| 0.043   | 54      |         | 61      | 7        | 67      |        | 53      | 15        |
| 0.054   | 39      | 36      | 41      | 2        | 75      | 74     | 76      | -2        |
| 0.07    | 37      | 35      | 37      | 0        | 91      | 91     | 98      | -7        |
| 0.092   | 36      | 35      | 40      | 4        | 84      | 84     | 90      | -6        |
| 0.126   | 40      | 37      | 53      | 13       | 75      | 74     | 65      | 10        |
| 0.104   | 46      | 49      | 57      | 11       | 80      | 70     | 57      | 23        |
| 0.077   | 28      | 38      | 41      | 12       | 73      | 69     | 60      | 13        |
| 0.05    | 33      | 42      | 43      | 11       | 88      | 79     | 64      | 24        |
| 0.102   | 30      | 37      | 34      | 5        | 99      | 87     | 78      | 22        |
| 0.056   | 43      | 42      | 49      | 6        | 83      | 79     | 79      | 4         |
| 0.065   | 37      | 38      | 41      | 4        | 80      | 73     | 72      | 7         |
| 0.136   | 42      | 44      | 49      | 7        | 90      | 83     | 62      | 28        |
| 0.123   | 33      | 39      | 39      | 5        | 94      | 105    | 94      | 0         |
| 0.038   | 39      | 37      | 40      | 1        | 68      | 71     | 76      | -8        |
| 0.05    | 39      |         | 39      | 1        | 80      |        | 88      |           |
| 0.102   | 46      | 46      | 55      | 9        | 76      | 76     | 75      | 1         |
| 0.094   | 33      | 36      | 40      | 7        | 74      | 68     | 64      | 10        |
| 0.085   | 41      | 38      | 39      | -2       | 84      | 90     | 74      | 10        |
| 0.085   | 43      | 43      | 47      | 4        | 78      | 74     | 56      | 21        |
| 0.089   | 40      | 40      | 42      | 2        | 83      | 89     | 70      | 13        |
| 0.165   | 35      | 40      | 44      | 9        | 95      | 78     | 65      | 30        |
| 0.05    | 42      | 44      | 42      | 0        | 83      | 85     | 84      | -1        |
|         | 34      | 34      |         |          | 62      | 71     |         |           |
| 0.015   | 43      |         | 49      | 6        | 92      |        | 102     | -10       |
| 0.081   | 39      | 34      | 44      | 6        | 81      | 81     | 57      | 25        |
| 0.09    | 48      | 52      | 57      | 9        | 74      | 75     | 69      | 5         |
| 0.027   | 64      | 63      | 65      | 2        | 51      | 50     | 42      | 10        |
| 0.106   | 36      |         | 32      | -4       | 79      |        | 75      | 4         |
| 0.048   | 48      |         | 60      | 12       | 66      |        | 58      | 7         |
| 0.125   | 44      | 44      | 50      | 6        | 73      | 66     | 57      | 15        |
| 0.111   | 47      | 47      | 54      | 6        | 67      | 63     | 53      | 13        |

|       |    |    |    |    |    |    |    |     |
|-------|----|----|----|----|----|----|----|-----|
| 0.099 | 41 | 45 | 45 | 4  | 87 | 81 | 66 | 21  |
| 0.097 | 41 | 45 | 40 | -1 | 81 | 79 | 88 | -7  |
| 0.044 | 44 | 43 | 43 | -1 | 70 | 69 | 84 | -15 |



| HCO3RS | HCO3LT | HCO3MX | BICBMX_ | SaO2RS | SaO2LT | SaO2_MX | SO2rst_m | SBPRS |
|--------|--------|--------|---------|--------|--------|---------|----------|-------|
| 24     |        | 26     | -2      | 90     |        | 78      | 12       | 134   |
| 24     |        | 22     | 2       | 96     |        | 91      | 5        | 127   |
| 24     | 25     | 22     | 2       | 94     | 94     | 86      | 8        | 143   |
| 23     | 23     | 21     | 2       | 96     | 96     | 95      | 1        | 134   |
| 27     | 26     | 25     | 3       | 96     | 96     | 85      | 11       | 142   |
| 23     | 22     | 21     | 2       | 97     | 96     | 87      | 10       | 130   |
| 23     | 23     | 20     | 3       | 97     | 95     | 93      | 3        | 156   |
| 23     | 24     | 21     | 2       | 97     | 96     | 94      | 3        | 150   |
| 27     | 27     | 27     | 1       | 95     | 94     | 88      | 6        | 158   |
| 24     | 23     | 22     | 2       | 96     | 97     | 96      | 1        | 152   |
| 27     | 26     | 25     | 2       | 96     | 95     | 95      | 1        | 123   |
| 29     |        | 28     | 1       | 93     |        | 84      | 9        | 125   |
| 24     | 23     | 21     | 3       | 95     | 95     | 95      | 0        | 167   |
| 25     | 25     | 20     | 4       | 97     | 97     | 97      | 0        | 125   |
| 24     | 23     | 20     | 4       | 96     | 96     | 96      | 0        | 140   |
| 28     | 25     | 25     | 3       | 96     | 95     | 91      | 5        | 145   |
|        |        |        |         |        |        |         |          | 131   |
| 27     | 26     | 24     | 3       | 96     | 93     | 86      | 10       | 123   |
| 23     | 24     | 24     | -1      | 96     | 94     | 91      | 5        | 134   |
| 21     | 25     | 22     | -1      | 99     | 96     | 91      | 7        | 166   |
| 22     | 23     | 19     | 3       | 98     | 97     | 95      | 3        | 120   |
| 25     | 25     | 24     | 1       | 96     | 95     | 95      | 1        | 147   |
| 26     | 24     | 23     | 3       | 96     | 95     | 94      | 2        | 174   |
| 26     | 24     | 20     | 6       | 97     | 96     | 89      | 8        | 135   |
| 25     | 24     | 20     | 5       | 97     | 98     | 99      | -1       | 128   |
| 25     | 25     | 23     | 2       | 94     | 95     | 95      | -1       | 161   |
| 25     |        | 22     | 3       | 96     |        | 96      | -1       | 150   |
| 24     | 24     | 21     | 3       | 95     | 94     | 92      | 2        | 120   |
| 22     | 22     | 20     | 2       | 95     | 93     | 90      | 5        | 126   |
| 25     | 23     | 19     | 5       | 96     | 97     | 94      | 3        | 125   |
| 25     | 23     | 21     | 4       | 95     | 94     | 86      | 9        | 159   |
| 26     | 25     | 21     | 5       | 96     | 97     | 93      | 4        | 178   |
| 24     | 24     | 19     | 6       | 97     | 95     | 90      | 7        | 132   |
| 25     | 25     | 22     | 3       | 96     | 96     | 96      | 0        | 145   |
| 24     | 23     | 22     | 2       | 92     | 95     |         |          | 148   |
| 25     |        | 26     | -1      | 97     |        | 97      | -1       | 160   |
| 24     | 22     | 21     | 3       | 96     | 96     | 87      | 9        | 133   |
| 27     | 26     | 24     | 3       | 98     | 94     | 92      | 7        | 157   |
| 27     | 27     | 25     | 2       | 82     | 80     | 69      | 12       | 161   |
| 23     |        | 18     | 5       | 96     |        | 98      | -3       | 204   |
| 26     |        | 28     | -1      | 92     |        | 88      | 5        | 158   |
| 21     | 24     | 20     | 1       | 94     | 92     | 85      | 9        | 156   |
| 21     | 25     | 21     | 0       | 93     | 91     | 82      | 10       | 178   |

|    |    |    |   |    |    |    |    |     |
|----|----|----|---|----|----|----|----|-----|
| 25 | 26 | 21 | 4 | 97 | 96 | 91 | 6  | 128 |
| 27 | 27 | 21 | 6 | 96 | 96 | 96 | 0  | 125 |
| 27 | 27 | 23 | 3 | 94 | 94 | 96 | -2 | 156 |

| SBPLT | SBP_MΔ | DBP_RST | DBPLT | DBP_MΔ | HR_RST | HRRS_MΔ | HRLT | HRLT_MΔ |
|-------|--------|---------|-------|--------|--------|---------|------|---------|
|       | 183    | 88      |       | 106    | 102    | 0.6     |      |         |
|       | 164    | 80      |       | 94     | 75     | 0.449   |      |         |
| 166   | 232    | 78      | 83    | 109    | 88     | 0.527   | 99   | 0.593   |
| 185   | 268    | 63      | 77    | 100    | 87     | 0.534   | 98   | 0.601   |
| 165   | 229    | 77      | 87    | 101    | 92     | 0.548   | 108  | 0.643   |
| 153   | 212    | 74      | 81    | 114    | 70     | 0.422   | 76   | 0.458   |
| 178   | 239    | 99      | 95    | 105    | 96     | 0.578   | 100  | 0.602   |
| 178   | 252    | 85      | 88    | 104    | 70     | 0.417   | 85   | 0.506   |
| 176   | 240    | 88      | 95    | 127    | 99     | 0.586   | 102  | 0.604   |
| 174   | 219    | 80      | 81    | 91     | 73     | 0.44    | 83   | 0.5     |
| 145   | 150    | 78      | 81    | 96     | 63     | 0.356   | 85   | 0.48    |
|       | 217    | 88      |       | 110    | 78     | 0.497   |      |         |
| 207   | 244    | 75      | 78    | 84     | 60     | 0.408   | 77   | 0.524   |
| 130   | 184    | 59      | 63    | 77     | 65     | 0.425   | 75   | 0.49    |
| 209   | 249    | 94      | 100   | 123    | 90     | 0.6     | 95   | 0.633   |
| 169   | 274    | 76      | 82    | 114    | 80     | 0.523   | 92   | 0.601   |
| 145   | 153    | 90      | 85    | 82     | 85     | 0.5     | 89   | 0.524   |
| 156   | 205    | 74      | 84    | 104    | 78     | 0.47    | 89   | 0.536   |
| 164   | 166    | 95      | 98    | 94     | 101    | 0.58    | 103  | 0.592   |
| 201   | 260    | 88      | 104   | 120    | 60     | 0.353   | 81   | 0.476   |
| 153   | 178    | 80      | 85    | 87     | 99     | 0.566   | 100  | 0.571   |
| 163   | 225    | 83      | 90    | 111    | 82     | 0.485   | 86   | 0.509   |
| 189   | 244    | 69      | 80    | 97     | 85     | 0.57    | 97   | 0.651   |
| 191   | 288    | 71      | 79    | 94     | 83     | 0.5     | 104  | 0.627   |
| 170   | 210    | 71      | 85    | 108    | 61     | 0.359   | 77   | 0.453   |
| 195   | 231    | 90      | 102   | 109    | 70     | 0.476   | 79   | 0.537   |
|       | 230    | 87      |       | 100    | 88     | 0.547   |      |         |
| 145   | 211    | 67      | 67    | 95     | 65     | 0.417   | 71   | 0.455   |
| 168   | 203    | 71      | 79    | 96     | 85     | 0.512   | 98   | 0.59    |
| 145   | 225    | 63      | 64    | 95     | 76     | 0.461   | 87   | 0.527   |
| 196   | 234    | 79      | 89    | 101    | 81     | 0.482   | 113  | 0.673   |
| 186   | 238    | 87      | 89    | 114    | 65     | 0.394   | 79   | 0.479   |
| 184   | 252    | 76      | 87    | 109    | 83     | 0.503   | 100  | 0.606   |
| 172   | 201    | 80      | 84    | 85     | 83     | 0.488   | 101  | 0.594   |
| 172   |        | 80      | 83    |        | 76     | 0.432   | 94   | 0.534   |
|       | 241    | 75      |       | 73     | 63     | 0.391   |      |         |
| 137   | 200    | 79      | 77    | 99     | 68     | 0.447   | 78   | 0.513   |
| 188   | 237    | 75      | 85    | 105    | 89     | 0.527   | 106  | 0.627   |
| 178   | 197    | 85      | 97    | 98     | 67     | 0.435   | 95   | 0.617   |
|       | 226    | 94      |       | 96     | 105    | 0.652   |      |         |
|       | 230    | 83      |       | 104    | 103    | 0.613   |      |         |
| 203   | 257    | 70      | 98    | 121    | 88     | 0.515   | 109  | 0.637   |
| 219   | 252    |         | 109   | 120    | 99     | 0.572   | 105  | 0.607   |

|     |     |    |    |    |    |       |     |       |
|-----|-----|----|----|----|----|-------|-----|-------|
| 155 | 197 | 69 | 69 | 77 | 66 | 0.388 | 82  | 0.482 |
| 137 | 163 | 83 | 84 | 96 | 96 | 0.623 | 117 | 0.76  |
| 176 | 215 | 74 | 83 | 85 | 69 | 0.463 | 76  | 0.51  |

| HR_PK | HRPK_M | HRPRDMX | VO2MXPRD | VO2_RST | VO2RS_MX | VO2ATVS |
|-------|--------|---------|----------|---------|----------|---------|
| 122   | 0.718  | 170     | 1630     | 240     | 0.147    | 400     |
| 158   | 0.946  | 167     | 1016     | 205     | 0.202    | 400     |
| 136   | 0.814  | 167     | 1349     | 234     | 0.173    | 470     |
| 133   | 0.816  | 163     | 1161     | 241     | 0.208    | 519     |
| 141   | 0.839  | 168     | 1718     | 261     | 0.152    |         |
| 109   | 0.657  | 166     | 1353     | 229     | 0.169    | 720     |
| 121   | 0.729  | 166     | 2057     | 227     | 0.11     | 548     |
| 151   | 0.899  | 168     | 1781     | 250     | 0.14     | 855     |
| 112   | 0.663  | 169     | 1242     | 200     | 0.161    | 380     |
| 118   | 0.711  | 166     | 1523     | 212     | 0.139    | 711     |
| 123   | 0.695  | 177     | 1538     | 208     | 0.135    | 549     |
| 102   | 0.65   | 157     | 1806     | 239     | 0.132    | 411     |
| 102   | 0.694  | 147     | 1648     | 212     | 0.129    | 472     |
| 134   | 0.876  | 153     | 1234     | 225     | 0.182    | 586     |
| 153   | 1.02   | 150     | 1579     | 273     | 0.173    | 679     |
| 134   | 0.876  | 153     | 1406     | 197     | 0.14     | 488     |
| 111   | 0.653  | 170     | 1775     | 176     | 0.099    | 875     |
| 108   | 0.651  | 166     | 1209     | 245     | 0.203    | 651     |
| 124   | 0.713  | 174     | 2251     | 259     | 0.115    |         |
| 104   | 0.612  | 170     | 1575     | 222     | 0.141    | 570     |
| 177   | 1.011  | 175     | 1980     | 388     | 0.196    | 759     |
| 108   | 0.639  | 169     | 1457     | 225     | 0.154    | 390     |
| 127   | 0.852  | 149     | 1444     | 255     | 0.177    | 680     |
| 157   | 0.946  | 166     | 1484     | 215     | 0.145    | 772     |
| 135   | 0.794  | 170     | 1633     | 252     | 0.154    | 887     |
| 115   | 0.782  | 147     | 1730     | 275     | 0.159    | 850     |
| 149   | 0.925  | 161     | 1467     | 255     | 0.174    | 1114    |
| 126   | 0.808  | 156     | 1346     | 330     | 0.245    | 950     |
| 130   | 0.783  | 166     | 1373     | 270     | 0.197    | 710     |
| 135   | 0.818  | 165     | 954      | 220     | 0.231    | 568     |
| 144   | 0.857  | 168     | 1340     | 278     | 0.207    | 838     |
| 142   | 0.861  | 165     | 1175     | 189     | 0.161    | 859     |
| 162   | 0.982  | 165     | 1930     | 271     | 0.14     | 1051    |
| 157   | 0.924  | 170     | 1958     | 214     | 0.109    | 599     |
| 152   | 0.864  | 176     | 2334     | 269     | 0.115    | 1165    |
| 121   | 0.752  | 161     | 1610     | 312     | 0.194    | 800     |
| 133   | 0.875  | 152     | 1190     | 203     | 0.171    | 909     |
| 136   | 0.805  | 169     | 1491     | 196     | 0.131    | 710     |
| 119   | 0.773  | 154     | 1183     | 164     | 0.139    |         |
| 160   | 0.994  | 161     | 936      | 211     | 0.225    | 838     |
| 138   | 0.821  | 168     | 1938     | 286     | 0.148    | 483     |
| 162   | 0.947  | 171     | 2180     | 338     | 0.155    | 1100    |
| 173   | 1      | 173     | 2480     | 347     | 0.14     | 933     |

|     |       |     |      |     |       |     |
|-----|-------|-----|------|-----|-------|-----|
| 122 | 0.718 | 170 | 1628 | 201 | 0.123 | 700 |
| 158 | 1.026 | 154 | 1583 | 217 | 0.137 | 608 |
| 92  | 0.617 | 149 | 1929 | 258 | 0.134 | 480 |

| VSLP_MX | VO2LT | VO2LT_MX | VO2PEAK | VO2PK_M | VO2/KGRS |
|---------|-------|----------|---------|---------|----------|
| 0.245   |       |          | 706     | 0.433   | 3.871    |
| 0.394   |       |          | 520     | 0.512   | 5        |
| 0.348   | 467   | 0.346    | 796     | 0.59    | 4.875    |
| 0.447   | 361   | 0.311    | 789     | 0.68    | 5.021    |
|         | 369   | 0.215    | 920     | 0.536   | 4.015    |
| 0.532   | 428   | 0.316    | 968     | 0.715   | 4.089    |
| 0.266   | 479   | 0.233    | 939     | 0.456   | 3.153    |
| 0.48    | 385   | 0.216    | 1045    | 0.587   | 3.731    |
| 0.306   | 287   | 0.231    | 425     | 0.342   | 3.704    |
| 0.467   | 480   | 0.315    | 940     | 0.617   | 3.475    |
| 0.357   | 491   | 0.319    | 824     | 0.536   | 4.245    |
| 0.228   |       |          | 526     | 0.291   | 4.121    |
| 0.286   | 515   | 0.313    | 874     | 0.53    | 3.365    |
| 0.475   | 349   | 0.211    | 958     | 0.776   | 4.091    |
| 0.43    | 419   | 0.265    | 965     | 0.611   | 4.475    |
| 0.347   | 397   | 0.282    | 884     | 0.629   | 3.283    |
| 0.493   | 376   | 0.212    | 1011    | 0.57    | 3.259    |
| 0.538   | 446   | 0.369    | 795     | 0.658   | 4.455    |
|         | 346   | 0.154    | 557     | 0.247   | 3.754    |
| 0.362   | 426   | 0.27     | 700     | 0.444   | 3.763    |
| 0.383   | 545   | 0.275    | 1287    | 0.65    | 6.467    |
| 0.268   | 230   | 0.158    | 523     | 0.359   | 4.167    |
| 0.471   | 475   | 0.329    | 1070    | 0.741   | 4.048    |
| 0.52    | 657   | 0.443    | 1193    | 0.804   | 3.909    |
| 0.543   | 638   | 0.391    | 1604    | 0.982   | 4.345    |
| 0.491   | 631   | 0.365    | 1470    | 0.85    | 4.074    |
| 0.759   |       |          | 1529    | 1.042   | 3.923    |
| 0.706   | 349   | 0.259    | 1266    | 0.941   | 6.346    |
| 0.517   | 575   | 0.419    | 1096    | 0.798   | 4.821    |
| 0.595   | 414   | 0.434    | 853     | 0.894   | 5        |
| 0.625   | 524   | 0.391    | 1355    | 1.011   | 5.245    |
| 0.731   | 393   | 0.334    | 1373    | 1.169   | 3.78     |
| 0.545   | 781   | 0.405    | 1821    | 0.944   | 4.169    |
| 0.306   | 578   | 0.295    | 1198    | 0.612   | 3.242    |
| 0.499   | 635   | 0.272    | 1975    | 0.846   | 3.587    |
| 0.497   |       |          | 1313    | 0.816   | 4.457    |
| 0.764   | 429   | 0.361    | 1184    | 0.995   | 4.413    |
| 0.476   | 609   | 0.408    | 1055    | 0.708   | 3.015    |
|         | 441   | 0.373    | 883     | 0.746   | 2.78     |
| 0.895   |       |          | 886     | 0.947   | 5.146    |
| 0.249   |       |          | 1310    | 0.676   | 3.287    |
| 0.505   | 907   | 0.416    | 1608    | 0.738   | 3.674    |
| 0.376   | 507   | 0.204    | 1647    | 0.664   | 4.035    |

|       |     |       |      |       |       |
|-------|-----|-------|------|-------|-------|
| 0.43  | 708 | 0.435 | 1492 | 0.916 | 3.722 |
| 0.384 | 575 | 0.363 | 1103 | 0.697 | 3.741 |
| 0.249 | 463 | 0.24  | 1142 | 0.592 | 3.308 |



| VO2_KG_LT | VO2_KGM | VCO2_RST | VCO2LT | VCO2MA | RERRS | RERLT | RERMAX |
|-----------|---------|----------|--------|--------|-------|-------|--------|
|           | 11.387  | 225      |        | 688    | 0.938 |       | 0.975  |
|           | 12.683  | 152      |        | 510    | 0.741 |       | 0.981  |
| 9.729     | 16.583  | 196      | 410    | 867    | 0.838 | 0.878 | 1.089  |
| 7.521     | 16.438  | 200      | 364    | 909    | 0.83  | 1.008 | 1.152  |
| 5.677     | 14.154  | 240      | 332    | 864    | 0.92  | 0.9   | 0.939  |
| 7.643     | 17.286  | 189      | 342    | 888    | 0.825 | 0.799 | 0.917  |
| 6.653     | 13.042  | 175      | 429    | 1137   | 0.771 | 0.896 | 1.211  |
| 5.746     | 15.597  | 218      | 344    | 1158   | 0.872 | 0.894 | 1.108  |
| 5.315     | 7.87    | 179      | 246    | 396    | 0.895 | 0.857 | 0.932  |
| 7.869     | 15.41   | 176      | 464    | 1064   | 0.83  | 0.967 | 1.132  |
| 10.02     | 16.816  | 169      | 412    | 911    | 0.813 | 0.839 | 1.106  |
|           | 9.069   | 194      |        | 456    | 0.81  |       | 0.86   |
| 8.175     | 13.873  | 173      | 483    | 910    | 0.82  | 0.938 | 1.04   |
| 4.727     | 17.418  | 174      | 298    | 1200   | 0.76  | 0.854 | 1.25   |
| 6.869     | 15.82   | 209      | 349    | 1040   | 0.77  | 0.833 | 1.08   |
| 6.617     | 14.733  | 176      | 362    | 980    | 0.89  | 0.912 | 1.11   |
| 6.963     | 18.722  | 145      | 369    | 1150   | 0.83  | 0.981 | 1.14   |
| 8.109     | 14.455  | 212      | 413    | 808    | 0.87  | 0.926 | 1.02   |
| 5.014     | 8.072   | 222      | 311    | 493    | 0.86  | 0.899 | 0.89   |
| 7.22      | 11.864  | 176      | 374    | 646    | 0.79  | 0.878 | 0.92   |
| 9.083     | 21.45   | 337      | 498    | 1553   | 0.87  | 0.914 | 1.21   |
| 4.259     | 9.685   | 196      | 205    | 497    | 0.88  | 0.891 | 0.95   |
| 7.54      | 16.984  | 225      | 378    | 1154   | 0.87  | 0.796 | 1.01   |
| 11.945    | 21.691  | 160      | 602    | 1315   | 0.744 | 0.916 | 1.102  |
| 11        | 27.655  | 200      | 539    | 1803   | 0.794 | 0.845 | 1.124  |
| 9.348     | 21.778  | 244      | 388    | 1400   | 0.887 | 0.615 | 0.952  |
|           | 23.523  | 230      |        | 1548   | 0.902 |       | 1.012  |
| 6.712     | 24.346  | 281      | 310    | 1326   | 0.852 | 0.888 | 1.047  |
| 10.268    | 19.571  | 240      | 487    | 1063   | 0.889 | 0.847 | 0.97   |
| 9.409     | 19.386  | 187      | 397    | 1006   | 0.85  | 0.959 | 1.179  |
| 9.887     | 25.566  | 203      | 465    | 1423   | 0.73  | 0.887 | 1.05   |
| 7.86      | 27.46   | 147      | 370    | 1629   | 0.778 | 0.941 | 1.186  |
| 12.015    | 28.015  | 253      | 671    | 2190   | 0.934 | 0.859 | 1.203  |
| 8.758     | 18.152  | 172      | 486    | 1240   | 0.804 | 0.841 | 1.035  |
| 8.467     | 26.333  | 226      | 577    | 2031   | 0.84  | 0.909 | 1.028  |
|           | 18.757  | 261      |        | 1268   | 0.837 |       | 0.966  |
| 9.326     | 25.739  | 159      | 370    | 1256   | 0.78  | 0.862 | 1.06   |
| 9.369     | 16.231  | 196      | 493    | 1078   | 0.78  | 0.81  | 1.02   |
| 7.475     | 14.966  | 126      | 372    | 815    | 0.77  | 0.844 | 0.92   |
|           | 21.61   | 170      |        | 777    | 0.8   |       | 0.88   |
|           | 15.057  | 213      |        | 1599   | 0.75  |       | 1.22   |
| 9.859     | 17.478  | 293      | 825    | 1965   | 0.87  | 0.91  | 1.22   |
| 5.895     | 19.151  | 292      | 456    | 1873   | 0.84  | 0.899 | 1.14   |

|        |        |     |     |      |      |       |      |
|--------|--------|-----|-----|------|------|-------|------|
| 13.111 | 27.63  | 176 | 637 | 1532 | 0.87 | 0.9   | 1.03 |
| 9.914  | 19.017 | 169 | 454 | 1225 | 0.78 | 0.79  | 1.11 |
| 5.936  | 14.641 | 225 | 385 | 1154 | 0.87 | 0.832 | 1.01 |

| WRLT | WRLT_M | WR_PK | WRPK_M | WRPRDM | O2PLSRS | O2PLSLT | O2PLSMX |
|------|--------|-------|--------|--------|---------|---------|---------|
|      |        | 46    | 0.343  | 134    | 2.353   |         | 5.787   |
|      |        | 40    | 0.417  | 96     | 2.733   |         | 3.291   |
| 0    | 0      | 71    | 0.573  | 124    | 2.659   | 4.717   | 5.853   |
| 11   | 0.101  | 75    | 0.686  | 109.4  | 2.77    | 3.684   | 5.932   |
| 0    | 0      | 85    |        | 143.3  | 2.837   | 3.417   | 6.525   |
| 0    | 0      | 94    | 0.701  | 134    | 3.271   | 5.632   | 8.881   |
| 26   | 0.149  | 92    | 0.526  | 175    | 2.365   | 4.79    | 7.76    |
| 0    | 0      | 133   | 0.899  | 148    | 3.571   | 4.529   | 6.921   |
| 0    | 0      | 17    | 0.137  | 124    | 2.02    | 2.814   | 3.795   |
| 36   | 0.247  | 96    | 0.658  | 146    | 2.904   | 5.783   | 7.966   |
| 43   | 0.295  | 88    | 0.603  | 146    | 3.302   | 5.776   | 6.699   |
|      |        | 25    | 0.157  | 159    | 3.064   |         | 5.157   |
| 0    | 0      | 60    | 0.411  | 146    | 3.533   | 6.688   | 8.569   |
| 0    | 0      | 91    | 0.867  | 105    | 3.462   | 3.467   | 7.149   |
| 0    | 0      | 99    | 0.643  | 154    | 3.033   | 4.411   | 6.307   |
| 0    | 0      | 65    | 0.542  | 120    | 2.463   | 4.315   | 6.597   |
| 0    | 0      | 88    | 0.537  | 164    | 2.071   | 4.225   | 9.108   |
| 0    | 0      | 55    | 0.466  | 118    | 3.141   | 5.011   | 7.361   |
| 0    | 0      | 33    | 0.176  | 188    | 2.564   | 3.359   | 4.492   |
| 19   | 0.135  | 49    | 0.348  | 141    | 3.7     | 5.259   | 6.731   |
| 27   | 0.147  | 118   | 0.641  | 184    | 3.919   | 5.45    | 7.271   |
| 0    | 0      | 3     | 0.021  | 143    | 2.744   | 2.674   | 4.843   |
| 0    | 0      | 75    | 0.615  | 122    | 3       | 4.897   | 8.425   |
| 55   | 0.417  | 122   | 0.924  | 132    | 2.59    | 6.317   | 7.599   |
| 59   | 0.472  | 146   | 1.168  | 125    | 4.131   | 8.286   | 11.881  |
| 20   | 0.154  | 132   | 1.015  | 130    | 3.929   | 7.987   | 12.783  |
|      |        | 128   | 1.008  | 127    | 2.898   |         | 10.262  |
| 6    | 0.051  | 105   | 0.89   | 118    | 5.077   | 4.915   | 10.048  |
| 28   | 0.239  | 81    | 0.692  | 117    | 3.176   | 5.867   | 8.431   |
| 30   | 0.286  | 72    | 0.686  | 105    | 2.895   | 4.759   | 6.319   |
| 39   | 0.295  | 107   | 0.811  | 132    | 3.432   | 4.637   | 9.41    |
| 23   | 0.19   | 128   | 1.058  | 121    | 2.908   | 4.975   | 9.669   |
| 65   | 0.419  | 198   | 1.277  | 155    | 3.265   | 7.81    | 11.241  |
| 40   | 0.267  | 124   | 0.827  | 150    | 2.578   | 5.723   | 7.631   |
| 43   | 0.229  | 185   | 0.984  | 188    | 3.539   | 6.755   | 12.993  |
|      |        | 97    | 0.638  | 152    | 4.952   |         | 10.851  |
| 17   | 0.153  | 112   | 1.009  | 111    | 2.985   | 5.5     | 8.902   |
| 36   | 0.269  | 95    | 0.709  | 134    | 2.202   | 5.745   | 7.757   |
| 0    | 0      | 60    | 0.638  | 94     | 2.448   | 4.642   | 7.42    |
|      |        | 70    | 1.273  | 55     | 2.01    |         | 5.538   |
|      |        | 116   | 0.725  | 160    | 2.777   |         | 9.493   |
| 63   | 0.432  | 175   | 1.199  | 146    | 3.841   | 8.321   | 9.926   |
| 21   | 0.107  | 159   | 0.811  | 196    | 3.505   | 4.829   | 9.52    |

|   |       |     |       |     |       |       |        |
|---|-------|-----|-------|-----|-------|-------|--------|
| 2 | 0.014 | 114 | 0.797 | 143 | 3.045 | 8.634 | 12.23  |
| 0 | 0     | 40  | 0.331 | 121 | 2.26  | 4.915 | 6.981  |
| 0 | 0     | 60  | 0.423 | 142 | 3.739 | 6.092 | 12.413 |

| VO2_WR1L | VO2_WR2 | VO2_WR_L | PaCO2RS | PaCO2LT | PaCO2MX | RERRS | RERLT |
|----------|---------|----------|---------|---------|---------|-------|-------|
|          |         | 5.901    | 39.8    |         | 52.7    | 0.938 |       |
|          |         | 3.682    | 40.5    |         | 44.1    | 0.741 |       |
| 2.616    | 4.802   | 4.457    | 43.5    | 46.7    | 52.7    | 0.838 | 0.878 |
| 5.079    | 7.075   | 6.93     | 42.4    | 44.2    | 47      | 0.83  | 1.008 |
|          |         | 5.94     | 50.6    | 50.2    | 59.8    | 0.92  | 0.9   |
| 5.3      | 6.245   | 6.145    | 39.4    | 38.7    | 48.9    | 0.825 | 0.799 |
| 5.45     | 7.409   | 6.929    | 32.8    | 33.1    | 32.2    | 0.771 | 0.896 |
| 6.409    | 4.347   | 6.641    | 33      | 39.4    | 43.3    | 0.872 | 0.894 |
|          |         | 3.386    | 43.2    | 43.1    | 47.9    | 0.895 | 0.857 |
| 7.011    | 6.968   | 7.397    | 38.9    | 38.1    | 39      | 0.83  | 0.967 |
| 5.282    | 7.563   | 7.538    | 39.3    | 41.9    | 46.7    | 0.813 | 0.839 |
|          |         | 1.925    | 53.5    |         | 60.8    | 0.81  |       |
|          |         | 7.141    | 38.9    | 35.8    | 40.7    | 0.82  | 0.938 |
| 7.172    | 7.586   | 7.544    | 37.3    | 34.7    | 37.2    | 0.76  | 0.854 |
| 5.011    | 5.886   | 6.26     | 36.3    | 34.9    | 40      | 0.77  | 0.833 |
|          |         | 8.52     | 39.5    | 36.5    | 52.7    | 0.89  | 0.912 |
| 8.731    | 8.2     | 7.385    |         |         |         | 0.83  | 0.981 |
| 6.122    | 9.557   | 7.969    | 46      | 49.1    | 57.1    | 0.87  | 0.926 |
|          |         | 6.476    | 28.1    | 38      | 40.5    | 0.86  | 0.899 |
| 8.216    | 9.06    | 8.544    | 32.5    | 41.6    | 43.4    | 0.79  | 0.878 |
| 7.147    | 6.996   | 7.89     | 29.5    | 36.7    | 34.3    | 0.87  | 0.914 |
|          |         | 0.318    | 42.9    | 42.4    | 49.3    | 0.88  | 0.891 |
|          |         | 11.2     | 37.2    | 37.9    | 40.7    | 0.87  | 0.796 |
| 7.312    | 7.047   | 7.582    | 41.9    | 43.5    | 48.8    | 0.744 | 0.916 |
| 8.308    | 8.775   | 9.6      | 33.4    | 38.5    | 38.7    | 0.794 | 0.845 |
| 4.631    | 8.787   | 8.209    | 38.8    | 36.7    | 39.8    | 0.887 | 0.765 |
|          |         | 8.183    | 38.7    |         | 39.4    | 0.902 |       |
| 9.461    | 8.862   | 10.067   | 45.7    | 45.9    | 55      | 0.852 | 0.888 |
| 5.95     | 10.65   | 8.37     | 33      | 35.7    | 40.4    | 0.889 | 0.847 |
| 6.872    | 8.659   | 8.453    | 40.8    | 38      | 39.1    | 0.85  | 0.959 |
| 8.835    | 5.174   | 8.434    | 43.2    | 43      | 46.8    | 0.73  | 0.887 |
| 9.501    | 7.863   | 9.432    | 40.1    | 39.9    | 41.7    | 0.778 | 0.941 |
| 7.11     | 7.282   | 8.097    | 35      | 39.9    | 44      | 0.934 | 0.859 |
| 4.493    | 7.246   | 6.961    | 42.2    | 43.7    | 41.9    | 0.804 | 0.841 |
| 9.143    | 8.495   | 8.986    | 33.9    | 33.7    |         | 0.84  | 0.909 |
|          |         | 8.072    | 43.3    |         | 49      | 0.837 |       |
| 7.421    | 7.573   | 7.949    | 38.7    | 34.2    | 44.2    | 0.78  | 0.862 |
| 4.136    | 7.727   | 6.79     | 47.8    | 51.8    | 57.2    | 0.78  | 0.81  |
|          |         | 7.385    | 63.5    | 63      | 65.3    | 0.77  | 0.844 |
|          |         | 7.341    | 36.2    |         | 32.3    | 0.8   |       |
|          |         | 8.115    | 47.7    |         | 59.8    | 0.75  |       |
| 6.589    | 5.928   | 6.839    | 43.7    | 44      | 50.1    | 0.87  | 0.91  |
| 7.186    | 7.518   | 8.004    | 47.4    | 47.3    | 53.8    | 0.84  | 0.899 |

|       |      |      |      |      |       |
|-------|------|------|------|------|-------|
| 6.331 | 40.6 | 44.9 | 45   | 0.87 | 0.9   |
|       | 41.3 | 44.9 | 40.4 | 0.78 | 0.79  |
| 12.3  | 44.2 | 42.9 | 42.8 | 0.87 | 0.832 |

| RERMX | PaO2RST | PaO2LT | PaO2_MX | A_aDO2R | A_aDO2L' | A_aDO2M | Vd_VtRS | Vd_VtLT |
|-------|---------|--------|---------|---------|----------|---------|---------|---------|
| 0.975 | 57.2    |        | 44.5    | 47      |          | 47      | 0.506   |         |
| 0.981 | 81.7    |        | 63.7    | 12      |          | 37      | 0.759   |         |
| 1.089 | 73.6    | 71.1   | 58.3    | 21      | 22       | 38      | 0.66    | 0.544   |
| 1.152 | 83.9    | 86.6   | 83.2    | 12      | 15       | 20      | 0.651   | 0.603   |
| 0.939 | 87.3    | 81.9   | 56.4    | 3       | 8        | 25      | 0.565   | 0.547   |
| 0.917 | 91.6    | 86.5   | 59.4    | 8       | 12       | 33      | 0.624   | 0.535   |
| 1.211 | 83.7    | 75.5   | 68.1    | 21      | 34       | 49      | 0.557   | 0.435   |
| 1.108 | 89      | 80.6   | 76.5    | 19      | 22       | 29      | 0.545   | 0.541   |
| 0.932 | 71.3    | 67.8   | 55.9    | 26      | 28       | 38      | 0.634   | 0.615   |
| 1.132 | 84.7    | 89.4   | 82.3    | 15      | 16       | 27      | 0.602   | 0.527   |
| 1.106 | 81.7    | 77.4   | 70.6    | 16      | 18       | 30      | 0.479   | 0.486   |
| 0.86  | 67.1    |        | 52.5    | 13      |          | 22      | 0.674   |         |
| 1.04  | 74.6    | 74.4   | 76.1    | 25      | 34       | 30      | 0.648   | 0.492   |
| 1.25  | 90.9    | 91.1   | 97.7    | 8       | 15       | 16      | 0.581   | 0.43    |
| 1.08  | 84      | 83.9   | 89.7    | 17      | 21       | 18      | 0.609   | 0.492   |
| 1.11  | 74.8    | 74.1   | 64.6    | 28      | 32       | 33      | 0.548   | 0.465   |
| 1.14  |         |        |         |         |          |         |         |         |
| 1.02  | 79.5    | 70     | 56.8    | 16      | 25       | 34      | 0.572   | 0.499   |
| 0.89  | 73      | 69.1   | 59.7    | 39      | 34       | 40      | 0.463   | 0.582   |
| 0.92  | 88      | 79     | 64.4    | 18      | 20       | 34      | 0.444   | 0.438   |
| 1.21  | 99.2    | 87.1   | 77.5    | 14      | 20       | 39      | 0.403   | 0.409   |
| 0.95  | 82.8    | 78.7   | 78.6    | 16      | 22       | 17      | 0.552   | 0.621   |
| 1.01  | 79.5    | 73.4   | 72.3    | 26      | 28       | 34      | 0.622   | 0.554   |
| 1.102 | 90      | 82.9   | 62.4    | 2       | 16       | 38      | 0.684   | 0.472   |
| 1.124 | 94      | 105    | 93.6    | 10      | -5       | 15      | 0.625   | 0.481   |
| 0.952 | 67.6    | 71     | 75.5    | 35      | 29       | 29      | 0.629   | 0.45    |
| 1.012 | 80.2    |        | 88.2    | 24      |          | 20      | 0.545   |         |
| 1.047 | 76.1    | 75.9   | 74.8    | 18      | 19       | 18      | 0.581   | 0.624   |
| 0.97  | 74      | 68.2   | 64      | 35      | 37       | 40      | 0.466   | 0.339   |
| 1.179 | 84      | 90     | 73.9    | 15      | 16       | 37      | 0.657   | 0.47    |
| 1.05  | 77.5    | 73.8   | 56.4    | 12      | 25       | 44      | 0.485   | 0.398   |
| 1.186 | 82.7    | 89.4   | 69.7    | 14      | 15       | 40      | 0.64    | 0.503   |
| 1.203 | 95      | 78.1   | 65.4    | 14      | 23       | 42      | 0.501   | 0.429   |
| 1.035 | 83.4    | 84.5   | 84      | 12      | 11       | 20      | 0.603   | 0.473   |
| 1.028 | 61.5    | 70.5   |         | 45      | 38       |         | 0.525   | 0.349   |
| 0.966 | 91.6    |        | 101.7   | 2       |          | -8      | 0.497   |         |
| 1.06  | 81.1    | 81.4   | 56.6    | 17      | 26       | 47      | 0.615   | 0.487   |
| 1.02  | 73.9    | 75.3   | 68.8    | 13      | 9        | 21      | 0.607   | 0.514   |
| 0.92  | 51.2    | 49.8   | 41.7    | 17      | 25       | 35      | 0.728   | 0.561   |
| 0.88  | 78.5    |        | 131.5   | 22      |          | -23     | 0.599   |         |
| 1.22  | 65.5    |        | 58.4    | 19      |          | 35      | 0.662   |         |
| 1.22  | 72.6    | 66     | 57.4    | 24      | 32       | 45      | 0.614   | 0.424   |
| 1.14  | 66.5    | 63.1   | 53.3    | 24      | 30       | 43      | 0.498   | 0.41    |

|      |      |      |      |    |    |    |       |       |
|------|------|------|------|----|----|----|-------|-------|
| 1.03 | 87.2 | 80.6 | 65.9 | 14 | 17 | 37 | 0.575 | 0.441 |
| 1.11 | 81.2 | 78.6 | 88   | 15 | 14 | 21 | 0.599 | 0.496 |
| 1.01 | 69.7 | 68.6 | 84.2 | 28 | 28 | 20 | 0.495 | 0.435 |



| VCO2RS | VCO2LT | VCO2MA | VERS   | VELT  | VEMX | VE_VCO2 | VE_VCO2 | VE_VCO2 |
|--------|--------|--------|--------|-------|------|---------|---------|---------|
| 225    |        | 688    | 9.875  |       | 24.8 | 43.889  |         | 36.047  |
| 152    |        | 510    | 13.45  |       | 25.5 | 88.487  |         | 50      |
| 196    | 410    | 867    | 11.425 | 16.6  | 27.7 | 58.291  | 40.488  | 31.949  |
| 200    | 364    | 909    | 11.675 | 17.9  | 34.9 | 58.375  | 49.176  | 38.394  |
| 240    | 332    | 864    | 9.4    | 12.6  | 25.8 | 39.167  | 37.952  | 29.861  |
| 189    | 342    | 888    | 11     | 16.4  | 33.4 | 58.201  | 47.953  | 37.613  |
| 175    | 429    | 1137   | 10.4   | 19.8  | 51.4 | 59.429  | 46.154  | 45.207  |
| 218    | 344    | 1158   | 12.525 | 16.4  | 44.1 | 57.454  | 47.674  | 38.083  |
| 179    | 246    | 396    | 9.775  | 12.8  | 18.2 | 54.609  | 52.033  | 45.96   |
| 176    | 464    | 1064   | 9.8    | 22.2  | 46.4 | 55.682  | 47.845  | 43.609  |
| 169    | 412    | 911    | 7.125  | 16.5  | 33   | 42.16   | 40.049  | 36.224  |
| 194    |        | 456    | 9.6    |       | 18.4 | 49.485  |         | 40.351  |
| 173    | 483    | 910    | 10.9   | 22.91 | 37.9 | 63.006  | 47.433  | 41.648  |
| 174    | 298    | 1200   | 9.6    | 13    | 50.3 | 55.172  | 43.624  | 41.917  |
| 209    | 349    | 1040   | 12.7   | 17    | 40.9 | 60.766  | 48.711  | 39.327  |
| 176    | 362    | 980    | 8.5    | 16    | 30.9 | 48.295  | 44.199  | 31.531  |
| 145    | 369    | 1150   | 11     | 21.8  | 53.9 | 75.862  | 59.079  | 46.87   |
| 212    | 413    | 808    | 9.3    | 14.5  | 24.4 | 43.868  | 35.109  | 30.198  |
| 222    | 311    | 493    | 12.7   | 16.9  | 24.4 | 57.207  | 54.341  | 49.493  |
| 176    | 374    | 646    | 8.4    | 13.8  | 22.3 | 47.727  | 36.898  | 34.52   |
| 337    | 498    | 1553   | 16.5   | 19.8  | 61.3 | 48.961  | 39.759  | 39.472  |
| 196    | 205    | 497    | 8.8    | 11    | 21   | 44.898  | 53.659  | 42.254  |
| 220    | 378    | 1154   | 13.5   | 19.3  | 45.5 | 61.364  | 51.058  | 39.428  |
| 160    | 602    | 1315   | 10.425 | 22.6  | 39.1 | 65.156  | 37.542  | 29.734  |
| 200    | 539    | 1803   | 13.775 | 23.3  | 60.1 | 68.875  | 43.228  | 33.333  |
| 244    | 388    | 1400   | 14.633 | 16.6  | 45.7 | 59.971  | 42.784  | 32.643  |
| 230    | 1548   | 1548   | 11.267 |       | 53.2 | 48.987  |         | 34.367  |
| 281    | 310    | 1326   | 12.675 | 15.5  | 39.1 | 45.107  | 50      | 29.487  |
| 240    | 487    | 1063   | 11.75  | 17.8  | 29.1 | 48.958  | 36.55   | 27.375  |
| 187    | 397    | 1006   | 11.533 | 17    | 41   | 61.674  | 42.821  | 40.755  |
| 203    | 465    | 1423   | 7.867  | 15.5  | 35.1 | 38.754  | 33.333  | 24.666  |
| 147    | 370    | 1629   | 8.8    | 16.1  | 55.2 | 59.864  | 43.514  | 33.886  |
| 253    | 671    | 2190   | 12.5   | 25.4  | 62   | 49.407  | 37.854  | 28.311  |
| 172    | 486    | 1240   | 8.85   | 18.2  | 39.1 | 51.453  | 37.449  | 31.532  |
| 226    | 577    | 2031   | 12.125 | 22.7  | 61.1 | 53.65   | 39.341  | 30.084  |
| 261    |        | 1268   | 10.35  |       | 41.5 | 39.655  |         | 32.729  |
| 159    | 370    | 1256   | 9.2    | 18.2  | 44   | 57.862  | 49.189  | 35.032  |
| 196    | 493    | 1078   | 9      | 16.9  | 29.9 | 45.918  | 34.28   | 27.737  |
| 126    | 372    | 815    | 6.3    | 11.6  | 20.2 | 50      | 31.183  | 24.785  |
| 170    |        | 777    | 10.1   |       | 29.2 | 59.412  |         | 37.58   |
| 213    |        | 1599   | 11.4   |       | 39.6 | 53.521  |         | 24.765  |
| 293    | 825    | 1965   | 15     | 28.1  | 53.5 | 51.195  | 34.061  | 27.226  |
| 292    | 456    | 1873   | 10.6   | 14.1  | 37   | 36.301  | 30.921  | 19.754  |

|     |     |      |     |      |      |        |        |        |
|-----|-----|------|-----|------|------|--------|--------|--------|
| 176 | 637 | 1532 | 8.8 | 21.9 | 45.9 | 50     | 34.38  | 29.961 |
| 169 | 454 | 1225 | 8.8 | 17.3 | 41.5 | 52.071 | 38.106 | 33.878 |
| 225 | 385 | 1154 | 8.7 | 13.7 | 35.5 | 38.667 | 35.584 | 30.763 |

| PaETCO2I | PaETCO2I | PaETCO2I | VE_VO2R | VE_VO2L | VE_VO2M | HGBGM | Hct    | Hct_Hb |
|----------|----------|----------|---------|---------|---------|-------|--------|--------|
| -2       |          | 2        | 41      |         | 35      | 13.7  | 40.442 | 2.952  |
| 12       |          | 5        | 66      |         | 49      | 13.7  | 39     | 2.847  |
| 5        | 3        | -2       | 49      | 36      | 35      | 13.7  | 40.6   | 2.964  |
| 4        | 5        | 2        | 48      | 50      | 44      | 13.6  | 41.4   | 3.044  |
| 5        | 2        | 4        | 36      | 34      | 28      | 15.5  | 46.3   | 2.987  |
| 4        | -2       | 0        | 48      | 38      | 35      | 15.3  | 46.9   | 3.065  |
| 2        | -1       | -2       | 46      | 41      | 55      | 15.2  | 45.2   | 2.974  |
| -1       | 0        | -14      | 50      | 43      | 42      | 14.5  | 42.6   | 2.938  |
| 5        | 4        | 5        | 49      | 45      | 43      | 12.6  | 37.195 | 2.952  |
| 8        | 3        | 3        | 46      | 46      | 49      | 13.2  | 38.966 | 2.952  |
| 5        | 3        | 3.7      | 34      | 34      | 40      | 11.8  | 36     | 3.051  |
| 9        |          | 10       | 40      |         | 35      | 14.6  | 45.6   | 3.123  |
| 9        | 0        | 3        | 51      | 44      | 43      | 15.9  | 48     | 3.019  |
| 4        | 0        | 3        | 43      | 37      | 53      | 13.9  | 41.7   | 3      |
| 7        | 1        | -1       | 47      | 41      | 42      | 17.5  | 52.9   | 3.023  |
| 0        | -3       | 0        | 43      | 40      | 35      | 15    | 45.9   | 3.06   |
|          |          |          | 63      | 58      | 53      | 15.1  | 46     | 3.046  |
| 4        | 1        | 1        | 38      | 33      | 31      | 15.5  | 18.9   | 1.219  |
| -5       | 5        | 5        | 49      |         | 44      | 15    | 41.8   | 2.787  |
| -7       | -1       | -5       | 38      | 32      | 32      | 13.1  | 39.4   | 3.008  |
| -8       | -1       | -3       | 43      | 36      | 48      | 10.9  | 34.5   | 3.165  |
| 5        | 9        | 6        | 39      | 48      | 40      | 12.9  | 40.5   | 3.14   |
| 8        | 5        | 4        | 53      | 41      | 43      | 14.8  | 43.9   | 2.966  |
| 2        | 0        | -2       | 48      | 34      | 33      | 14.9  | 42.4   | 2.846  |
| 4        | 3        | -1       | 55      | 37      | 37      | 14.7  | 44.5   | 3.027  |
| 8        | 1        | -3       | 53      | 33      | 31      | 16.8  | 49.9   | 2.97   |
| 6.2      |          | -2       | 44      |         | 35      | 13.2  | 39.8   | 3.015  |
| 11       | 9        | 3        | 38      | 44      | 31      | 14.4  | 42.508 | 2.952  |
| -1       | -5       | -8       | 44      | 31      | 27      | 17.1  | 50.479 | 2.952  |
| 8        | 1        | 1        | 52      | 41      | 48      | 13.5  | 38.3   | 2.837  |
| 3        | -3       | -1       | 28      | 30      | 26      | 14.9  | 43.5   | 2.919  |
| 4        | 2        | 1        | 47      | 41      | 40      | 15.4  | 43.7   | 2.952  |
| 2        | 0        | -8       | 46      | 33      | 34      | 15.4  | 43.7   | 2.952  |
| 4        | -1       | -6       | 41      | 31      | 33      | 14.1  | 41     | 2.908  |
| 4        | -3       |          | 45      | 36      | 31      | 14.7  | 43.5   | 2.959  |
| 9        |          | 6        | 33      |         | 32      | 13.4  | 40     | 2.985  |
| 7        | 1        | 2        | 45      | 42      | 37      | 15.8  | 47     | 2.975  |
| 2        | 0        | -4       | 46      | 28      | 28      | 14.5  | 43.9   | 3.028  |
| 11       | 6        | 1        | 38      | 26      | 23      | 18.9  | 62.5   | 3.307  |
| 5        |          | 0        | 48      |         | 33      | 17    |        |        |
| 0        |          | -3       | 40      |         | 30      | 16.5  | 52.9   | 3.206  |
| 4        | -1       | -5       | 44      | 31      | 33      | 16.7  | 47.5   | 2.844  |
| 0        | -4       | -16      | 31      | 28      | 22      | 16.1  | 46.7   | 2.901  |

|   |    |    |    |    |    |      |      |       |
|---|----|----|----|----|----|------|------|-------|
| 7 | 2  | -1 | 44 | 31 | 31 | 14   | 41.9 | 2.993 |
| 5 | 1  | -4 | 41 | 30 | 39 | 16.5 | 49.3 | 2.988 |
| 3 | -1 | -4 | 34 | 30 | 31 | 15.9 | 48   | 3.019 |

| COHGB | METHGB | PLATELE | ALBUMIN | GLOBULIN | TTL_PRO | GOT | GPT | BIL_D |
|-------|--------|---------|---------|----------|---------|-----|-----|-------|
| 2     | 0.3    |         | 4.4     | 3.3      | 7.7     | 18  | 11  | 0.2   |
| 0.3   | 0.3    | 16.6    | 3.8     | 3.6      | 7.4     | 37  |     | 0.3   |
| 2.8   | 0.3    | 22.2    | 4.2     | 2.6      | 6.8     | 17  | 12  | 0.2   |
| 1.5   | 0.3    |         | 4       | 3.8      | 7.8     | 16  | 14  | 0.2   |
| 1     | 0      | 25.9    | 4.7     | 2.9      | 7.6     | 33  | 16  | 0.1   |
| 2.1   | 0.2    | 19.3    | 4.2     | 2.7      | 6.9     | 13  | 7   | 0.2   |
| 0.8   | 0.1    | 24.1    | 3.8     | 2.6      | 6.4     | 59  | 76  | 0.2   |
| 1.2   | 0.3    | 17.9    | 4.3     | 2.9      | 7.2     | 21  | 17  | 0.2   |
| 2.2   | 0.2    |         | 3.6     | 3.4      | 7       | 23  | 16  | 0.1   |
| 2.7   | 0.3    | 31.3    | 4.5     | 3.5      | 8       |     |     | 0.2   |
| 0     | 0      | 27.8    | 4       | 2.5      | 6.5     | 24  | 12  | 0.1   |
| 1.4   | 0.3    | 36      | 4.3     | 3.9      | 8.2     | 79  | 47  | 0.1   |
| 1.5   | 0.3    | 14.8    |         |          |         |     |     |       |
| 2.2   | 0.3    | 22.2    | 4.1     | 3.3      | 7.4     | 20  | 9   | 0.2   |
| 1.2   | 0.3    | 23.5    |         |          |         | 15  | 7   | 0.1   |
| 2     | 0.3    | 38.4    | 4       | 3.3      | 7.3     | 48  | 64  | 0.1   |
| 1     |        | 16      |         |          |         |     |     |       |
| 0.9   | 0.3    | 25.8    |         |          |         | 21  | 15  | 0.2   |
| 1.3   | 0.3    | 27.1    | 3.9     | 2.6      | 6.5     | 22  | 34  | 0.7   |
| 0.1   | 0.2    | 23      | 3.1     | 2.8      |         | 24  | 25  | 0.2   |
| 0.1   | 0.2    | 31      | 4.2     |          | 7.3     | 13  | 5   | 2     |
| 0.9   | 0.3    | 31.1    | 4.2     | 3.3      | 7.5     | 36  | 26  | 0.2   |
| 0.8   | 0.3    | 19      | 4.1     | 2.9      | 7       | 17  | 14  | 0.2   |
| 1.5   | 0.2    | 19      | 4.5     | 2.7      | 7.2     | 23  | 11  | 0.2   |
| 0.1   | 0.1    | 21.7    | 3.8     | 2.7      | 6.5     | 15  | 11  | 0.2   |
| 1.1   | 0.3    | 29.3    | 4.2     | 2.3      | 6.5     | 74  | 67  | 0.3   |
| 0.6   | 0.2    |         | 4.1     | 2.7      | 6.8     | 24  | 28  | 0.2   |
| 0.5   | 0.3    |         | 3.8     | 1.9      | 5.7     | 16  | 12  | 0.2   |
| 1.4   | 0.3    | 16.5    | 4.1     | 2.6      | 6.7     | 25  | 18  | 0.2   |
| 2     | 0.2    | 19.1    | 4.2     | 2.4      | 6.6     | 25  | 16  | 0.2   |
| 1.6   | 0.3    | 23.1    | 4.4     | 2.6      | 7       | 22  | 17  | 0.2   |
| 2.5   | 0.3    | 27.2    | 3.1     | 4.7      | 7.8     | 34  | 25  | 0.2   |
| 1.2   | 0.2    | 27.2    | 4.6     | 3.3      | 7.9     | 24  | 18  | 0.3   |
| 1     | 0.3    | 24      | 4.7     | 3.1      | 7.8     | 33  | 15  | 0.1   |
| 0.9   | 0.1    | 22.7    | 4.1     | 2.7      | 6.8     | 16  | 11  | 0.3   |
|       |        | 27.3    | 4.3     | 3.4      | 7.7     | 16  | 8   | 0.2   |
| 1.7   | 0.3    | 17.4    | 4.2     | 3        | 7.2     | 20  | 12  | 0.2   |
| 1.2   | 0.3    | 25.6    | 4.3     |          | 7.6     | 21  | 17  | 0.2   |
| 4.7   | 0.3    | 18.1    | 4       | 3.1      | 7.1     | 24  | 12  | 0.2   |
| 1.1   | 0.2    |         |         |          |         |     |     |       |
|       |        | 21.6    | 4.2     |          | 7.5     | 23  | 14  | 0.2   |
| 1     | 0.3    | 18.5    |         |          |         | 19  | 14  | 0.1   |
| 0.3   | 0.3    |         | 5       |          | 7.4     |     |     |       |

|     |     |      |     |     |     |    |    |     |
|-----|-----|------|-----|-----|-----|----|----|-----|
| 2.2 | 0.3 | 21.3 | 4.3 | 2.5 | 6.8 | 43 | 49 | 0.2 |
| 0.8 | 0.3 | 26.7 | 4.4 | 3.1 | 7.1 | 18 | 13 | 0.2 |
| 1.4 | 0.3 | 20.1 | 4.4 | 2.5 | 6.9 | 27 | 28 | 0.2 |

| Cr | Na  | K   | Cl  | SUGAR | CHOL | TG  | veo2mx_lt | PO2mx_rs    |
|----|-----|-----|-----|-------|------|-----|-----------|-------------|
|    | 1.1 | 139 | 4.2 | 105   | 110  | 190 | 110       | -12.7       |
|    | 0.8 | 139 | 4.4 | 109   | 105  | 170 | 104       | -18         |
|    | 1   | 142 | 4.5 | 111   | 90   | 210 | 81        | 0.979 -15.3 |
|    | 0.7 | 139 | 5.1 | 112   | 96   | 140 | 61        | 0.892 -0.7  |
|    | 1   | 137 | 5.2 | 103   | 92   | 214 | 146       | 0.821 -30.9 |
|    | 0.9 | 140 | 4.7 | 111   | 98   | 162 | 65        | 0.9 -32.2   |
|    | 1.1 | 143 | 3.9 | 114   | 116  | 177 | 91        | 1.324 -15.6 |
|    | 1.3 | 145 | 3.9 | 112   | 107  | 242 | 99        | 0.991 -12.5 |
|    | 1.2 | 141 | 4.2 | 106   | 92   | 253 | 89        | 0.96 -15.4  |
|    |     | 141 | 4.6 |       | 90   | 139 | 49        | 1.067 -2.4  |
|    | 1   | 142 | 4.1 | 108   | 98   | 176 | 53        | 1.192 -11.1 |
|    | 1.2 | 136 |     | 101   | 67   | 213 | 51        | -14.6       |
|    |     |     |     |       |      |     |           | 0.975 1.5   |
|    | 1.1 | 139 | 4.1 | 109   | 85   | 174 | 83        | 1.41 6.8    |
|    | 0.9 | 138 | 4.1 | 115   | 103  | 93  | 141       | 1.044 5.7   |
|    | 1.4 | 140 | 4.5 |       | 91   | 178 |           | 0.867 -10.2 |
|    |     |     |     |       |      |     |           | 0.92        |
|    | 1.2 | 141 | 3.6 | 104   | 105  | 203 |           | 0.944 -22.7 |
|    | 1.1 | 135 | 4.2 | 103   | 114  | 193 |           | 0.004 -13.3 |
|    | 1   | 141 | 4.6 |       | 103  | 184 |           | 0.983 -23.6 |
|    | 0.9 | 139 | 3   | 108   | 96   | 141 | 44        | 1.311 -21.7 |
|    | 1.1 |     |     |       | 95   | 243 | 89        | 0.84 -4.2   |
|    | 1   | 141 | 4   | 108   | 89   | 242 | 235       | 1.047 -7.2  |
|    | 1.2 | 140 | 5   | 107   | 115  | 195 | 179       | 0.953 -27.6 |
|    | 1.1 | 140 | 3.9 | 109   | 86   | 169 | 73        | 1.026 -0.4  |
|    | 0.9 | 144 | 4   | 109   | 87   | 193 | 110       | 0.95 7.9    |
|    | 1.1 | 141 | 4.6 | 107   | 152  | 165 | 140       | 8           |
|    | 1.1 | 141 | 4.4 | 111   | 95   | 194 | 114       | 0.695 -1.3  |
|    | 1   | 139 | 4   | 109   | 86   | 144 | 54        | 0.858 -10   |
|    | 1.3 | 143 | 4.8 | 110   | 96   | 182 | 138       | 1.171 -10.1 |
|    | 1.1 | 140 | 4   | 108   | 122  | 225 | 95        | 0.876 -21.1 |
|    | 0.9 | 135 | 4.4 |       | 97   | 107 | 57        | 0.981 -13   |
|    | 0.9 | 140 | 4.4 | 110   | 121  | 165 | 47        | 1.047 -29.6 |
|    | 1.3 | 141 | 4.5 | 108   | 99   | 195 | 63        | 1.037 0.6   |
|    | 0.9 | 142 | 4   | 114   | 89   | 156 | 86        | 0.865       |
|    | 1.6 |     |     |       | 103  | 235 |           | 10.1        |
|    | 1.1 | 141 | 4.4 | 111   | 85   | 175 | 71        | 0.876 -24.5 |
|    | 1   | 141 | 4.2 | 106   | 90   | 158 | 86        | 1.021 -5.1  |
|    | 1   | 139 | 5   | 98    | 86   | 187 | 60        | 0.87 -9.5   |
|    | 1.4 | 146 | 2.6 | 91    | 116  | 169 | 90        | -7.1        |
|    | 1.2 | 140 | 4.7 | 107   |      | 110 | 96        | 1.074 -15.2 |
|    | 1   | 142 | 4.4 |       |      | 224 | 82        | 0.808 -13.2 |

|     |     |     |     |     |     |     |       |       |
|-----|-----|-----|-----|-----|-----|-----|-------|-------|
| 1   | 144 | 4.3 | 111 | 79  | 153 | 46  | 0.995 | -21.3 |
| 1.7 | 141 | 4.3 | 104 | 91  | 191 | 202 | 1.289 | 6.8   |
| 1   | 143 | 4.2 | 109 | 114 | 205 | 235 | 1.051 | 14.5  |



| PCO2mx_1 | MVV   | FEV1_35 | FEV1_20+ | FEV1_40 | FEV1 | VERS_M\ | VELT_M\ | VEMX_M |
|----------|-------|---------|----------|---------|------|---------|---------|--------|
| 12.9     | 30    | 30.8    | 37.6     | 35.2    | 0.88 | 0.329   |         | 0.827  |
| 3.6      | 30.3  | 36.4    | 40.8     | 41.6    | 1.04 | 0.444   |         | 0.842  |
| 9.2      | 18.4  | 30.8    | 37.6     | 35.2    | 0.88 | 0.621   | 0.902   | 1.505  |
| 4.6      | 30.6  | 45.5    | 46       | 52      | 1.3  | 0.382   | 0.585   | 1.141  |
| 9.2      | 17.2  | 25.55   | 34.6     | 29.2    | 0.73 | 0.547   | 0.733   | 1.5    |
| 9.5      | 17    | 44.1    | 45.2     | 50.4    | 1.26 | 0.647   | 0.965   | 1.965  |
| -0.6     | 51.1  | 63.35   | 56.2     | 72.4    | 1.81 | 0.204   | 0.387   | 1.006  |
| 10.3     | 46.6  | 60.9    | 54.8     | 69.6    | 1.74 | 0.269   | 0.352   | 0.946  |
| 4.7      | 32.2  | 32.2    | 38.4     | 36.8    | 0.92 | 0.304   | 0.398   | 0.565  |
| 0.1      | 57.05 | 46.9    | 46.8     | 53.6    | 1.34 | 0.172   | 0.389   | 0.813  |
| 7.4      | 39.5  | 41.65   | 43.8     | 47.6    | 1.19 | 0.18    | 0.418   | 0.835  |
| 7.3      | 11.1  | 10.5    | 26       | 12      | 0.3  | 0.865   |         | 1.658  |
| 1.8      | 33.25 | 33.25   | 39       | 38      | 0.95 | 0.328   | 0.689   | 1.14   |
| -0.1     | 51.45 | 51.45   | 49.4     | 58.8    | 1.47 | 0.187   | 0.253   | 0.978  |
| 3.7      | 30.8  | 34.65   | 39.8     | 39.6    | 0.99 | 0.412   | 0.552   | 1.328  |
| 13.2     | 35    | 26.25   | 35       | 30      | 0.75 | 0.243   | 0.457   | 0.883  |
|          | 98    | 87.5    | 70       | 100     | 2.5  | 0.112   | 0.222   | 0.55   |
| 11.1     | 16.88 | 21.7    | 32.4     | 24.8    | 0.62 | 0.551   | 0.859   | 1.445  |
| 12.4     | 25.66 | 18.9    | 30.8     | 21.6    | 0.54 | 0.495   | 0.659   | 0.951  |
| 10.9     | 25.4  | 28      | 36       | 32      | 0.8  | 0.331   | 0.543   | 0.878  |
| 4.8      | 81    | 95.9    | 74.8     | 109.6   | 2.74 | 0.204   | 0.244   | 0.757  |
| 6.4      | 21    | 25.55   | 34.6     | 29.2    | 0.73 | 0.419   | 0.524   | 1      |
| 3.5      | 44.29 | 30.1    | 37.2     | 34.4    | 0.86 | 0.305   | 0.436   | 1.027  |
| 6.9      | 30.7  | 39.9    | 42.8     | 45.6    | 1.14 | 0.34    | 0.736   | 1.274  |
| 5.3      | 55    | 49.7    | 48.4     | 56.8    | 1.42 | 0.25    | 0.424   | 1.093  |
| 1        | 28.8  | 30.8    | 37.6     | 35.2    | 0.88 | 0.508   | 0.576   | 1.587  |
| 0.7      | 45.9  | 65.1    | 57.2     | 74.4    | 1.86 | 0.245   |         | 1.159  |
| 9.3      | 20.7  | 32.2    | 38.4     | 36.8    | 0.92 | 0.612   | 0.749   | 1.889  |
| 7.4      | 18.4  | 27.65   | 35.8     | 31.6    | 0.79 | 0.639   | 0.967   | 1.582  |
| -1.7     | 25.2  | 38.85   | 42.2     | 44.4    | 1.11 | 0.458   | 0.675   | 1.627  |
| 3.6      | 26.3  | 37.8    | 41.6     | 43.2    | 1.08 | 0.299   | 0.589   | 1.335  |
| 1.6      | 54.6  | 63.7    | 56.4     | 72.8    | 1.82 | 0.161   | 0.295   | 1.011  |
| 9        | 48.1  | 65.1    | 57.2     | 74.4    | 1.86 | 0.26    | 0.528   | 1.289  |
| -0.3     | 37    | 46.2    | 46.4     | 52.8    | 1.32 | 0.239   | 0.492   | 1.057  |
|          | 45    | 58.1    | 53.2     | 66.4    | 1.66 | 0.269   | 0.504   | 1.358  |
| 5.7      | 49.4  | 36.75   | 41       | 42      | 1.05 | 0.21    |         | 0.84   |
| 5.5      | 34    | 33.6    | 39.2     | 38.4    | 0.96 | 0.271   | 0.535   | 1.294  |
| 9.4      | 23    | 22.4    | 32.8     | 25.6    | 0.64 | 0.391   | 0.735   | 1.3    |
| 1.8      | 30    | 31.5    | 38       | 36      | 0.9  | 0.21    | 0.387   | 0.673  |
| -3.9     | 41    | 39.55   | 42.6     | 45.2    | 1.13 | 0.246   |         | 0.712  |
| 12.1     | 32.2  | 40.6    | 43.2     | 46.4    | 1.16 | 0.354   |         | 1.23   |
| 6.4      | 30.63 | 29.4    | 36.8     | 33.6    | 0.84 | 0.49    | 0.917   | 1.747  |
| 6.4      | 64.8  | 52.15   | 49.8     | 59.6    | 1.49 | 0.164   | 0.218   | 0.571  |

|      |      |       |      |      |      |       |       |       |
|------|------|-------|------|------|------|-------|-------|-------|
| 4.4  | 28.2 | 33.6  | 39.2 | 38.4 | 0.96 | 0.312 | 0.777 | 1.628 |
| -0.9 | 28   | 36.05 | 40.6 | 41.2 | 1.03 | 0.314 | 0.618 | 1.482 |
| -1.4 | 28   | 38.5  | 42   | 44   | 1.1  | 0.311 | 0.489 | 1.268 |

BrRes

0.173

0.158

-0.505

-0.141

-0.5

-0.965

-0.006

0.054

0.435

0.187

0.165

-0.658

-0.14

0.022

-0.328

0.117

0.45

-0.445

0.049

0.122

0.243

0

-0.027

-0.274

-0.093

-0.587

-0.159

-0.889

-0.582

-0.627

-0.335

-0.011

-0.289

-0.057

-0.358

0.16

-0.294

-0.3

0.327

0.288

-0.23

-0.747

0.429

-0.628  
-0.482  
-0.268
